# Supplementary material
Source: PubMed Central journal article supplement (PMC5508996)
Supplement: NIHMS874768-supplement-Supplementary_Information.pdf [file NIHMS874768-supplement-Supplementary_Information.pdf]

SUPPLEMENTARY INFORMATION FOR:

## The Genomic Landscape of Core-Binding Factor Acute Myeloid Leukemias

Zachary J. Faber<sup>1,7</sup>, Xiang Chen<sup>2,7</sup>, Amanda Larson Gedman<sup>1,7</sup>, Kristy Boggs<sup>2</sup>, Jinjun Cheng<sup>1</sup>, Jing Ma<sup>1</sup>, Ina Radtke<sup>1</sup>, Jyh-Rong Chao<sup>1</sup>, Michael P. Walsh<sup>1</sup>, Guangchun Song<sup>1</sup>, Anna K. Andersson<sup>1‡</sup>, Jinjun Dang<sup>1</sup>, Li Dong<sup>1</sup>, Yu Liu<sup>2</sup>, Robert Huether<sup>2</sup>, Zhongling Cai<sup>1</sup>, Heather Mulder<sup>2</sup>, Gang Wu<sup>2</sup>, Michael Edmonson<sup>2</sup>, Michael Rusch<sup>2</sup>, Chunxu Qu<sup>2</sup>, Yongjin Li<sup>2</sup>, Bhavin Vadodaria<sup>2</sup>, Jianmin Wang<sup>2</sup>, Erin Hedlund<sup>2</sup>, Xueyuan Cao<sup>3</sup>, Donald Yergeau<sup>2</sup>, Joy Nakitandwe<sup>1</sup>, Stanley B. Pounds<sup>3</sup>, Sheila Shurtleff<sup>1</sup>, Robert S. Fulton<sup>5</sup>, Lucinda L. Fulton<sup>5</sup>, John Easton<sup>2</sup>, Evan Parganas<sup>1</sup>, Ching-Hon Pui<sup>6</sup>, Jeffrey E. Rubnitz<sup>6</sup>, Li Ding<sup>5</sup>, Elaine R. Mardis<sup>5</sup>, Richard K. Wilson<sup>5</sup>, Tanja A. Gruber<sup>6</sup>, Charles G. Mullighan<sup>1</sup>, Richard F. Schlenk<sup>4</sup>, Peter Paschka<sup>4</sup>, Konstanze Döhner<sup>4</sup>, Hartmut Döhner<sup>4</sup>, Lars Bullinger<sup>4\*</sup>, Jinghui Zhang<sup>2\*</sup>, Jeffery M. Klco<sup>1\*</sup>, James R. Downing<sup>1\*</sup>

<sup>1</sup>Department of Pathology, St. Jude Children's Research Hospital, Memphis, Tennessee, USA

<sup>2</sup>Department of Computational Biology and Bioinformatics, St. Jude Children's Research Hospital, Memphis, Tennessee, USA

<sup>3</sup>Department of Biostatistics, St. Jude Children's Research Hospital, Memphis, Tennessee, USA

<sup>4</sup>Department of Internal Medicine III, University of Ulm, Ulm, Germany

<sup>5</sup>McDonnell Genome Institute at Washington University, St. Louis, Missouri, USA

<sup>6</sup>Department of Oncology, St. Jude Children's Research Hospital, Memphis, Tennessee, USA

<sup>7</sup>These authors contributed equally to this work

‡ Current affiliation: Division of Clinical Genetics, Department of Laboratory Medicine, Lund University, Lund, Sweden

\*Corresponding Authors: Lars Bullinger (lars.bullinger@uniklinik-ulm.de), Jinghui Zhang (Jinghui.Zhang@StJude.org), Jeffery M. Klco (Jeffery.Klco@StJude.org), and James R. Downing (James.Downing@StJude.org)

## TABLE OF CONTENTS

### Supplementary Figures

- Supplementary Figure 1: Comparison of outcomes in CBF-AML
- Supplementary Figure 2: Mutations identified per case in CBF-AML
- Supplementary Figure 3: Trinucleotide mutational spectrum of CBF AML
- Supplementary Figure 4: Clonal architecture in CBF-AML
- Supplementary Figure 5: Circos plots of genetic alterations in CBF-AML
- Supplementary Figure 6: Impact of signaling mutations on outcome in CBF-AML
- Supplementary Figure 7: Distribution of signaling mutations in CBF-AML subgroups
- Supplementary Figure 8: Impact of *NRAS* mutations on outcome in CBF-AML
- Supplementary Figure 9: Impact of *KIT* mutations on outcome in CBF-AML
- Supplementary Figure 10: *CCND2* stabilization
- Supplementary Figure 11: *DHX15* p. R222G mutation in CBF-AML
- Supplementary Figure 12: Gene Set Enrichment Analysis of *DHX15* depleted cells
- Supplementary Figure 13: Mutations in epigenetic regulators found in CBF-AML
- Supplementary Figure 14: Impact of *ASXL2* mutations on outcome in *RUNX1-RUNX1T1* rearranged CBF-AML
- Supplementary Figure 15: *ASXL2* mutations alter myeloid differentiation
- Supplementary Figure 16: Exon coverage of *ASXL1*
- Supplementary Figure 17: Mutations in cohesin genes in CBF-AML
- Supplementary Figure 18: Impact of cohesin mutations on outcome in CBF-AML
- Supplementary Figure 19: *ZBTB7A* mutations in CBF AML
- Supplementary Figure 20: Gene set enrichment analysis
- Supplementary Figure 21: The 9a isoform of *RUNX1T1* was detected in all cases of *RUNX1-RUNX1T1* CBF leukemia
- Supplementary Figure 22: Clonal evolution between diagnosis and relapse in CBF-AML
- Supplementary Figure 23: CBF AML mutation spectrum vs TCGA AMLs
- Supplementary Figure 24: CoIP full-length blots

### Supplementary Tables

- Supplementary Table 1: Clinical information for all 165 sequenced tumor samples
- Supplementary Table 2: Coding region SNVs per case of CBF-AML
- Supplementary Table 3: Coverage data for WGS cohort
- Supplementary Table 4: Coverage data for WES cohort
- Supplementary Table 5: Validated mutations found in the 17 WGS cases
- Supplementary Table 6: Validated WES mutations
- Supplementary Table 7: Recurrent somatic mutations in discovery and recurrency cohorts
- Supplementary Table 8: Copy number alterations identified by WGS
- Supplementary Table 9: Validated structural variants for the 17 pediatric CBF-AML discovery cases
- Supplementary Table 10: Rank ordered list of genes differentially expressed in *DHX15* knockdown cells and their enrichment in the Reactome mRNA splicing gene set
- Supplementary Table 11: Rank ordered list of genes differentially expressed in *DHX15* knockdown cells and their enrichment in the KEGG ribosome gene set
- Supplementary Table 12: GSEA enriched gene sets after *DHX15* knockdown
- Supplementary Table 13: Spectral counts (SC) of proteins identified in pull down experiments

with wildtype (Wt) or R222G (Mut) DHX15

Supplementary Table 14: RNAseq *RUNX1-RUNX1T1* upregulated genes

Supplementary Table 15: RNAseq *RUNX1-RUNX1T1* downregulated genes

Supplementary Table 16: GSEA gene list

Supplementary Table 17: Copy Number Analysis of de novo-relapse pairs

Supplementary Table 18: Deep sequencing read counts in diagnosis, germline, and relapse trios

Supplementary Table 19: Oligonucleotides used in this study

Supplementary Note

References

**Supplementary Figure 1. Comparison of outcomes and ages in CBF-AML.** Kaplan-Meier curves depicting overall survival (OS) and event free survival (EFS) are shown for RUNX1-RUNX1T1 and CBFβ-MYH11 cases in adult and pediatric cases. Number of cases in each group is shown in parentheses. P values were determined by log rank test.

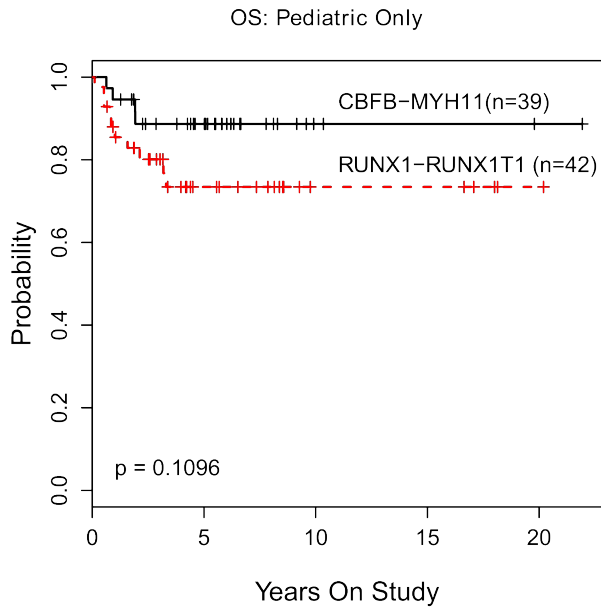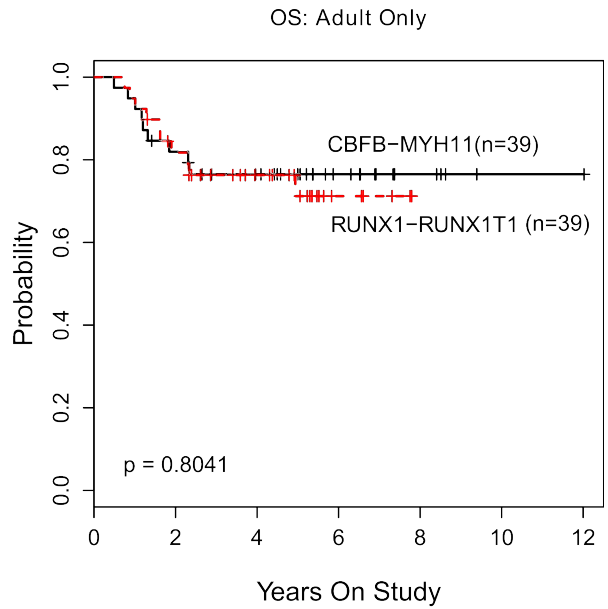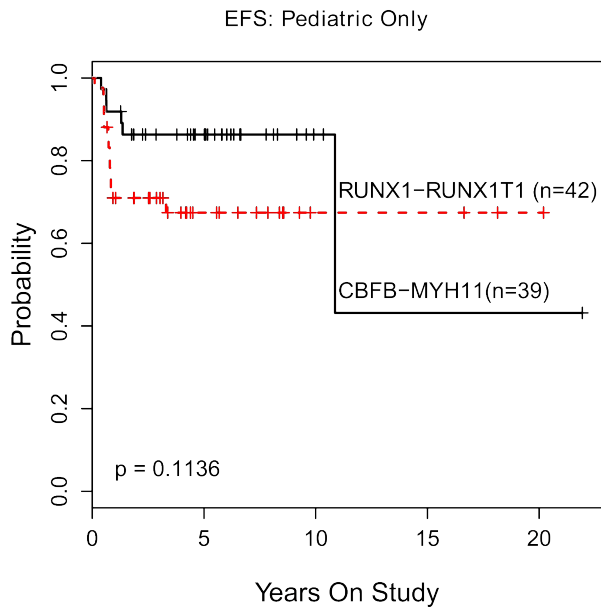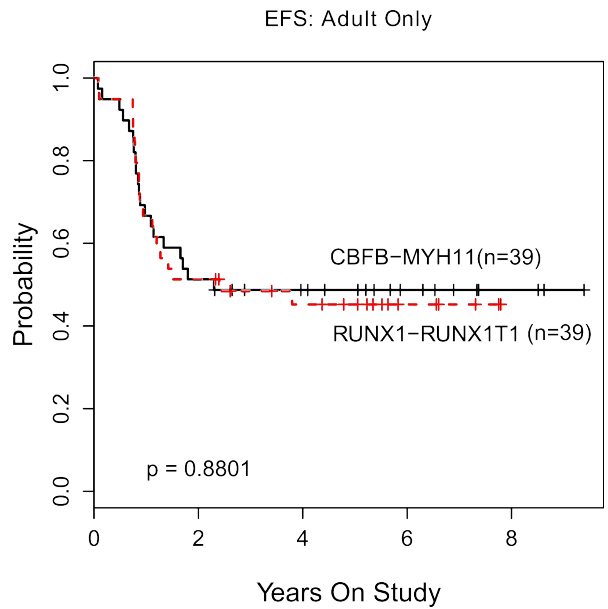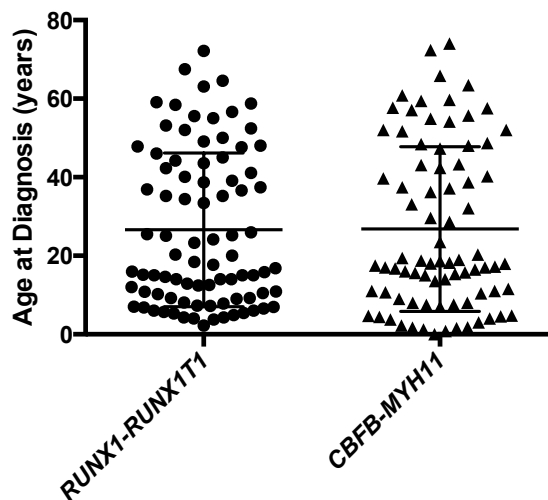

**Supplementary Figure 2. Mutation number in CBF-AML cases.** The number of functional somatic mutations is shown for each case broken down by both a) age group and b) fusion status. Functional mutations are defined as coding missense, nonsense, and indel mutations as well as mutations at splice sites. The mean of the data is shown. \*  $p < 0.0001$ , exact Wilcoxon rank-sum test based on 10,000 permutations.

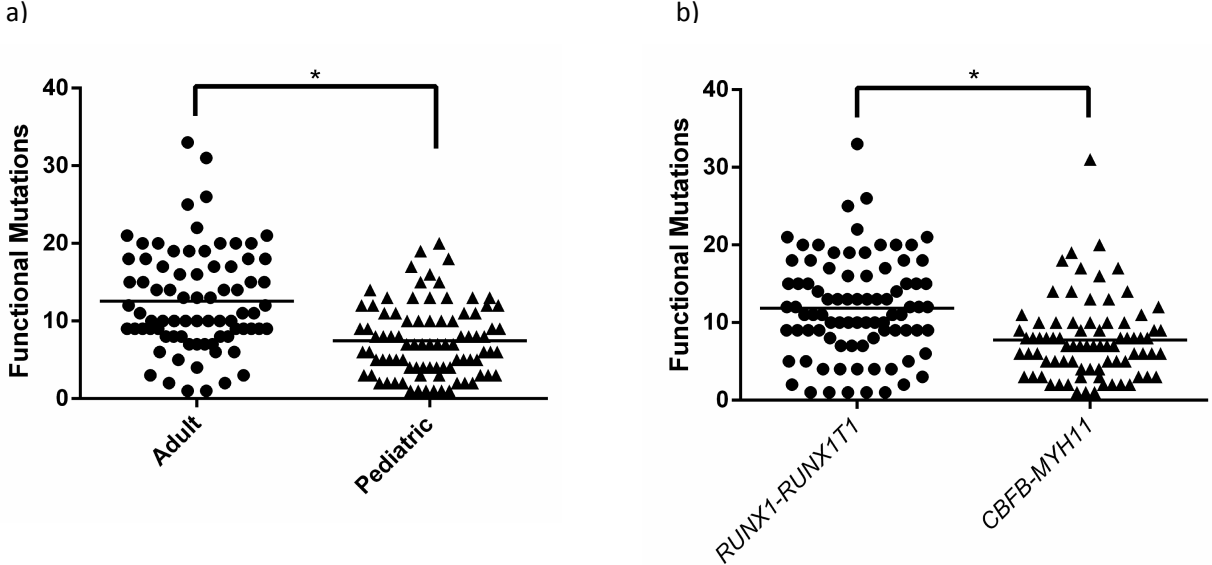



**Supplementary Figure 4. Clonal architecture in CBF-AML.** Mutant allele frequency (MAF) of each of the 17 cases that underwent whole genome sequencing is shown. Case I.D. and number of somatic variants identified by WGS (n=#) are shown above each histogram. Estimated tumor purity is also shown for each case (top right). Coverage at each variant is shown in the bottom plot. The class of each variant is indicated by the color (black – coding, grey – noncoding, red – signaling, blue – epigenetic, cyan – cohesin, and purple – novel). The signaling, epigenetic, cohesin, and novel gene groups as the same as those shown in Figure 1.



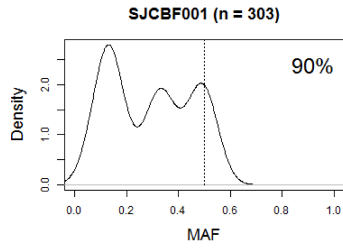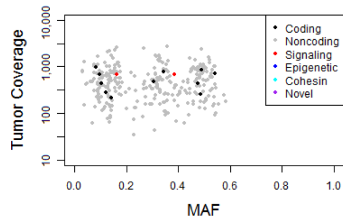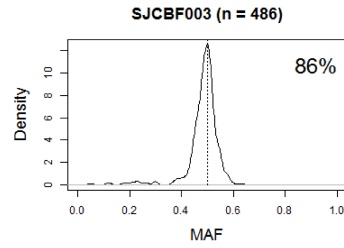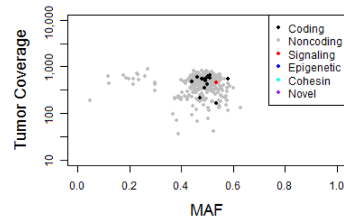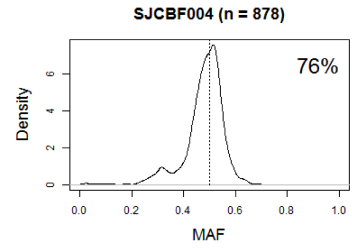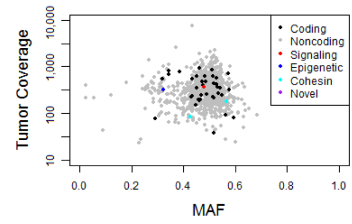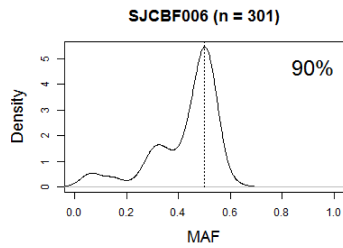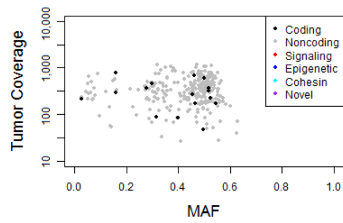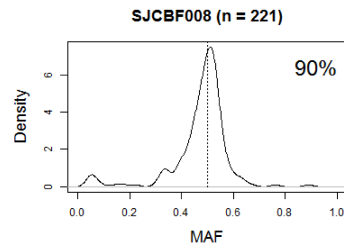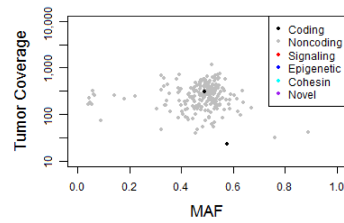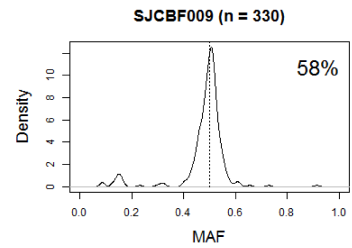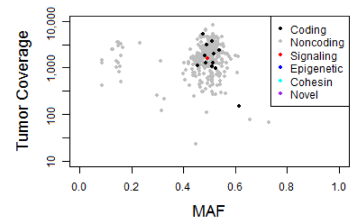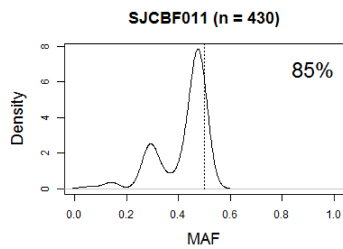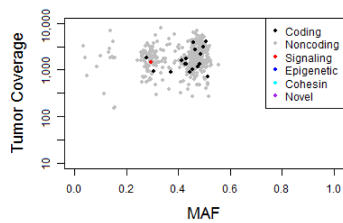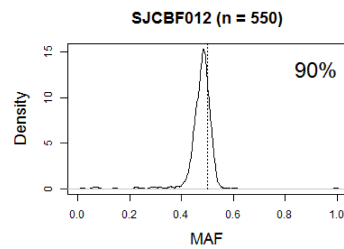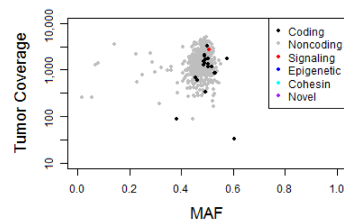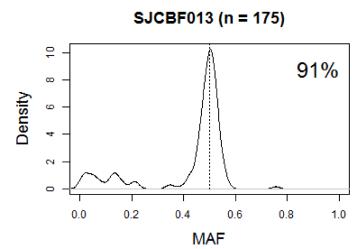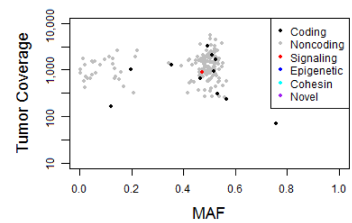

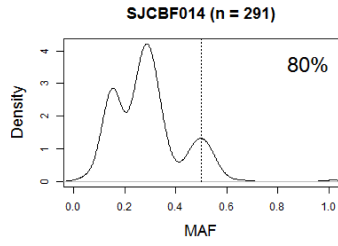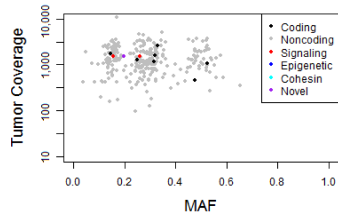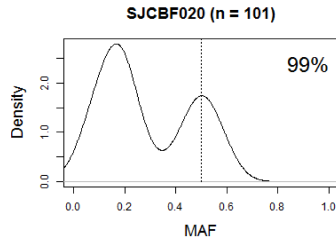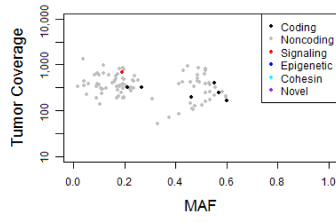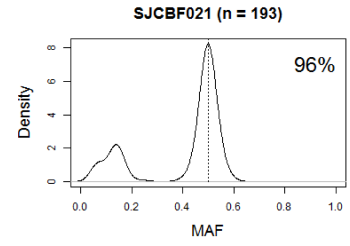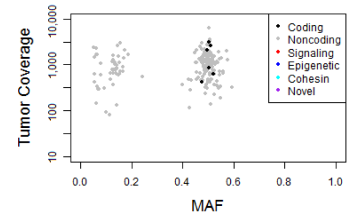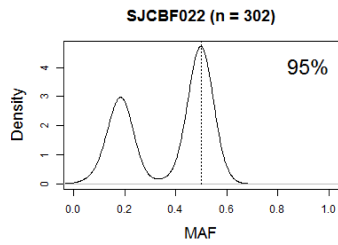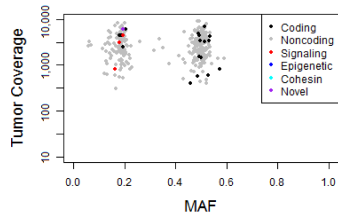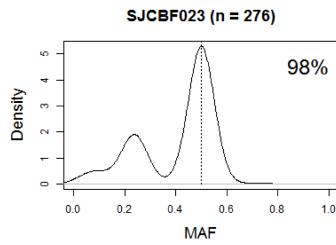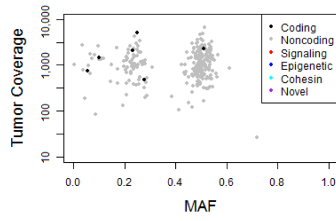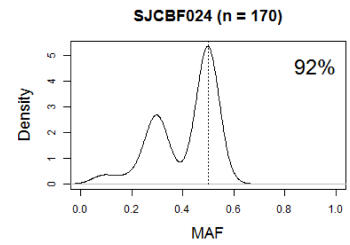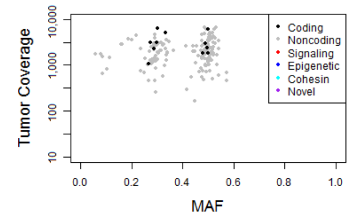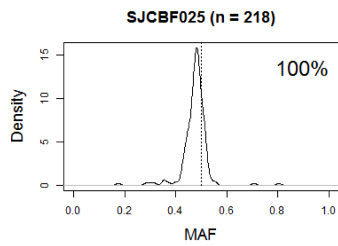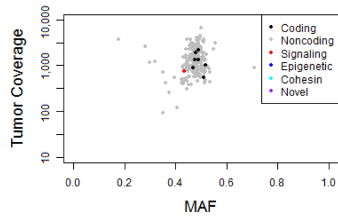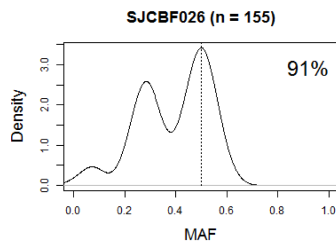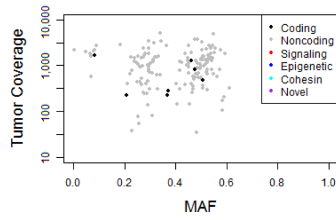

**Supplementary Figure 5. Circos plots of genetic alterations in CBF-AML.** Loss-of-heterozygosity structural variations, copy number variations, and mutation data from the 17 WGS cases.



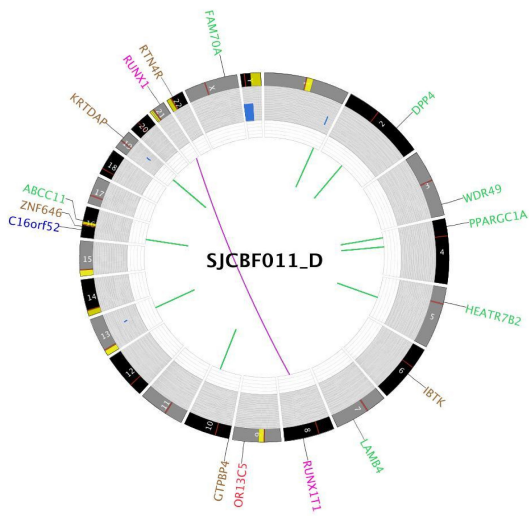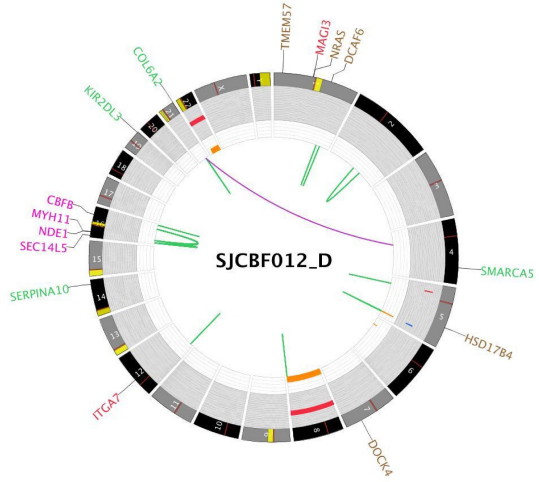

\*labels for gene disrupting SVs removed

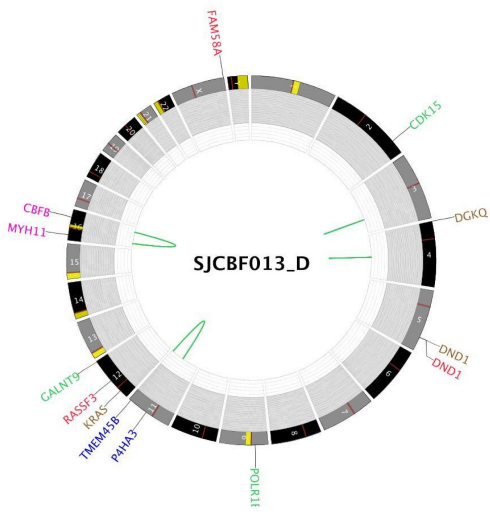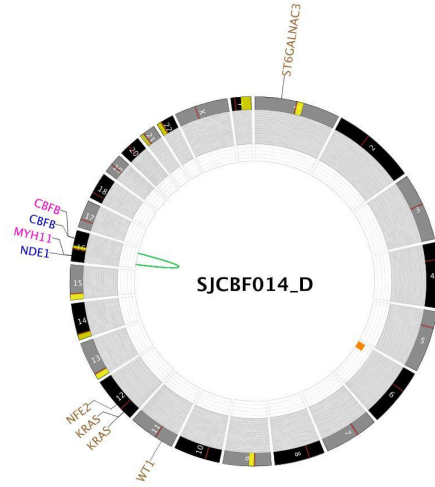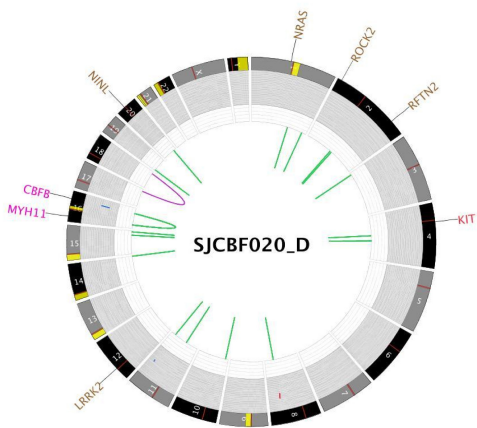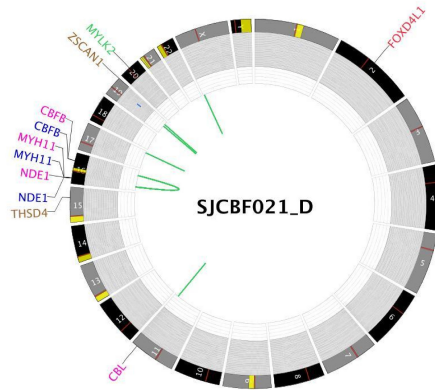

\*labels for gene disrupting SVs removed

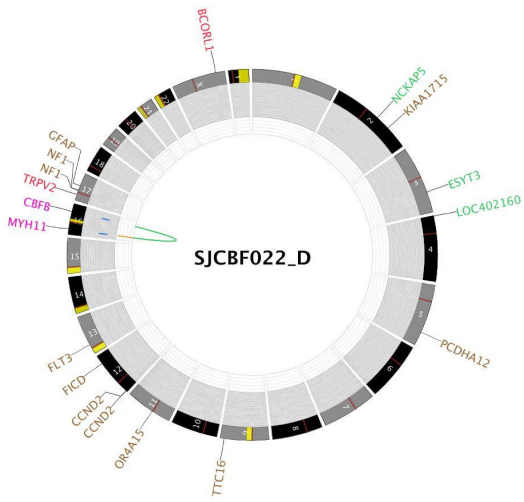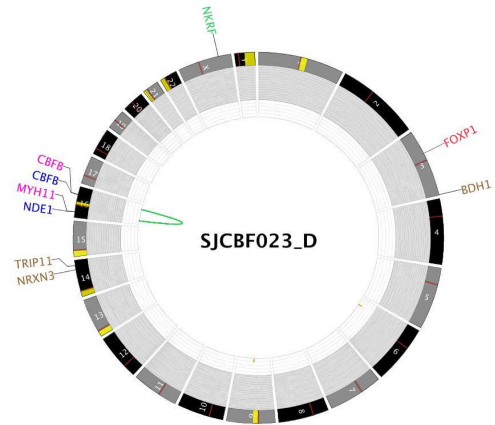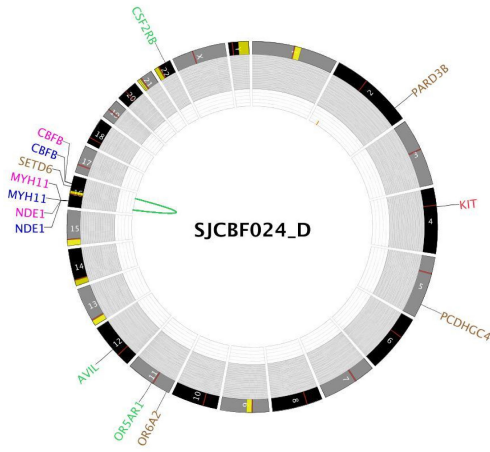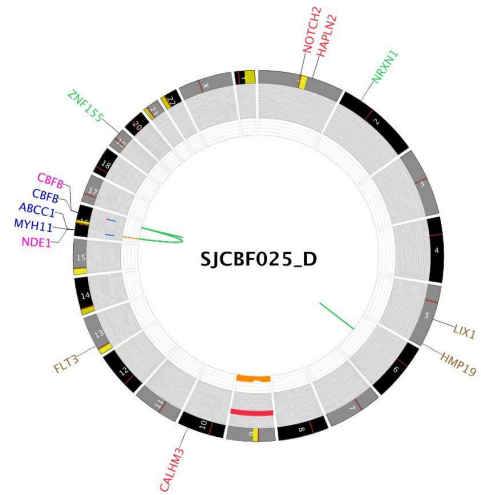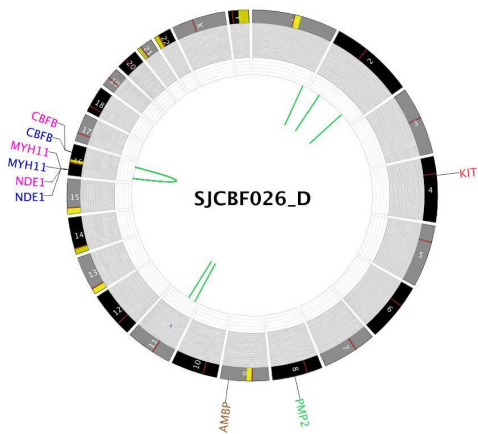

**LOH**

Orange square: LOH

**SV**

Blue square: Gene name

Green square: Intrachromosomal

Magenta square: In Frame

Purple square: Interchromosomal

**CNV**

Blue square: Loss

Red square: Gain

**Mutations**

Blue square: Splice/Intron/UTR

Brown square: Mis/nonsense

Green square: Silent

Red square: Indel/Frameshift

**Supplementary Figure 6. Impact of signaling mutations on outcome in CBF-AML.** Outcome analysis for CBF-AML based on signaling mutations. The genes in the signaling group are: *KRAS*, *NRAS*, *FLT3*, *KIT*, *NF1*, and *PTPN11*. a) Event free survival. b) Overall survival. P values correspond to log rank tests. Association of indicated mutations with c) event free survival (EFS) or d) overall survival (OS). e) Multivariable Cox Model. HR – hazard ratio, HR95CI – 95% confidence interval for the hazard ratio.

a)

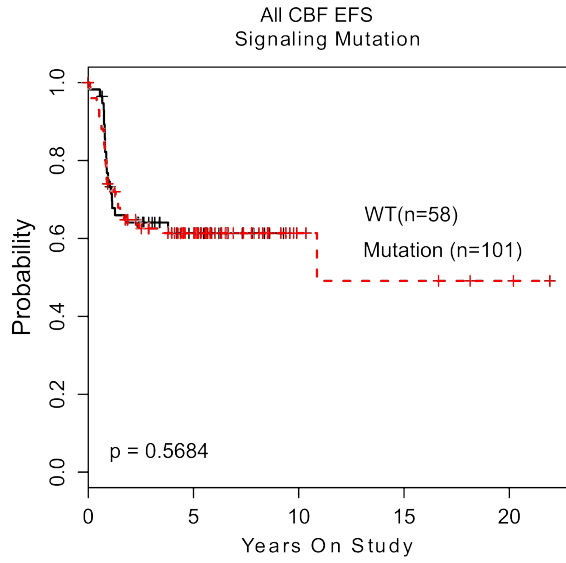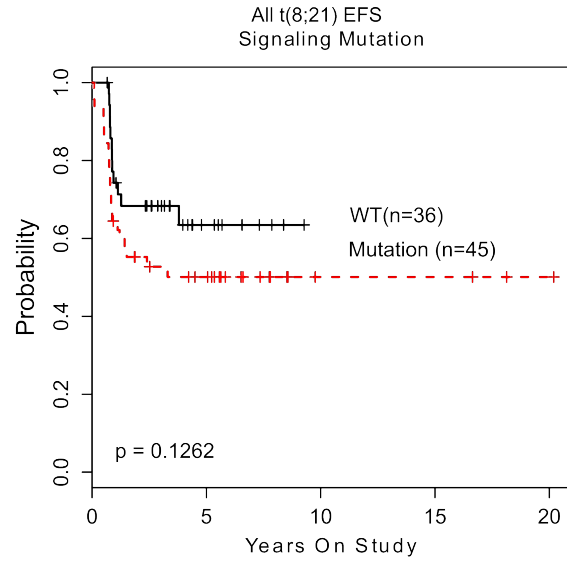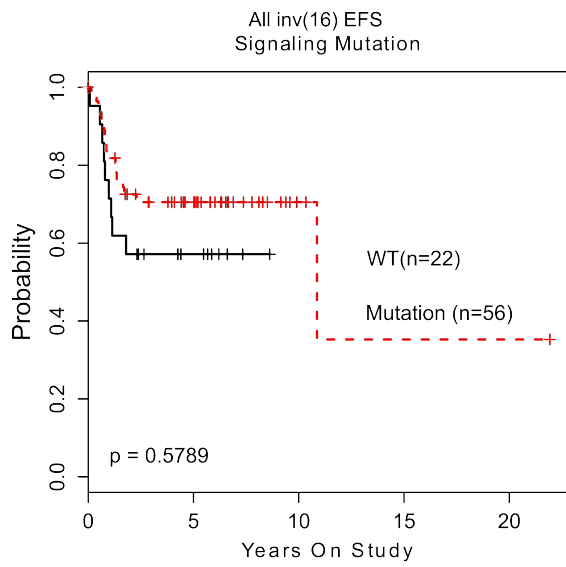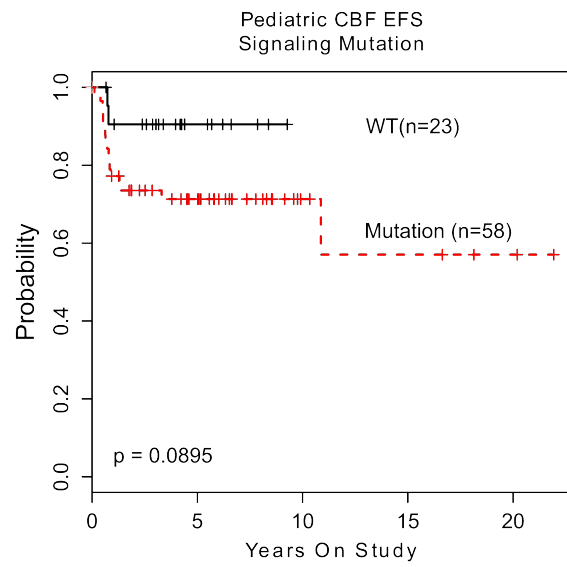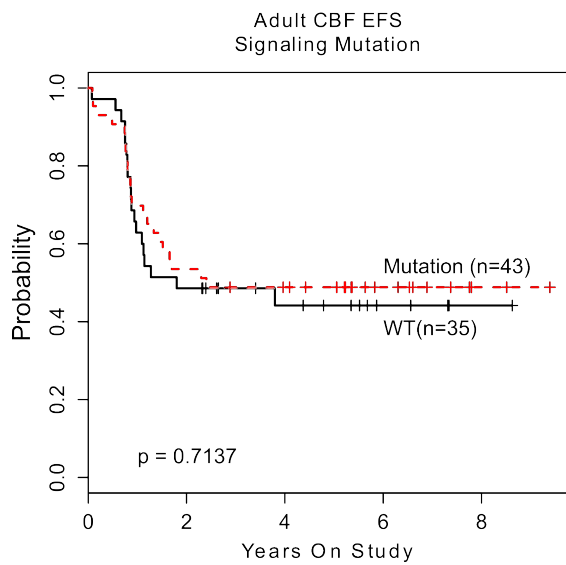



b)

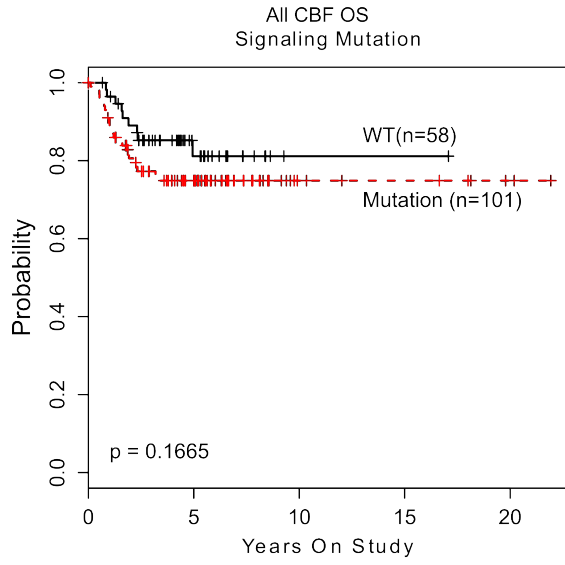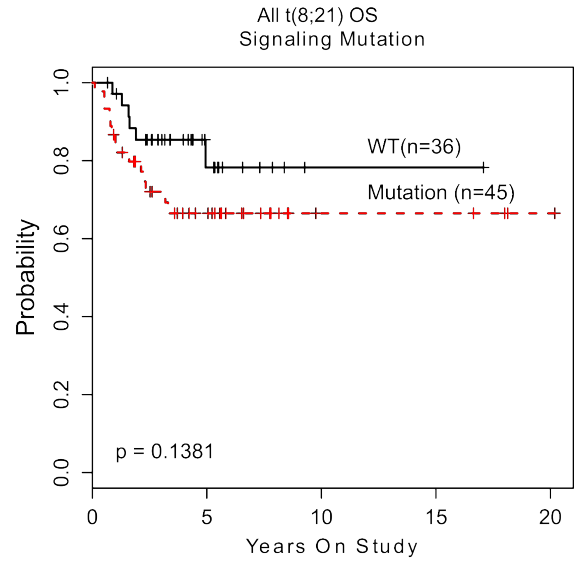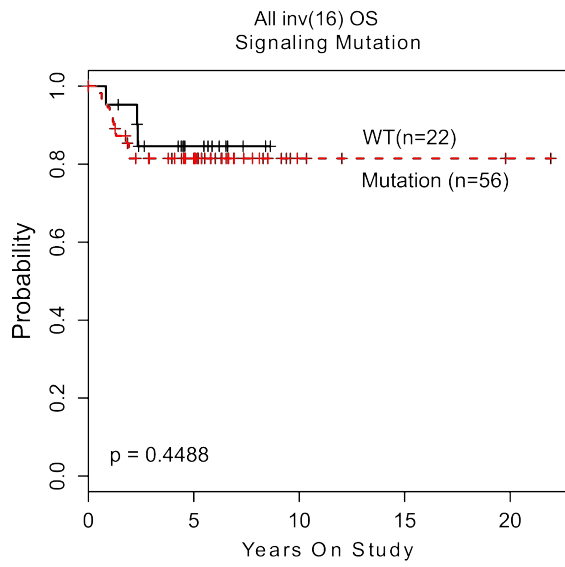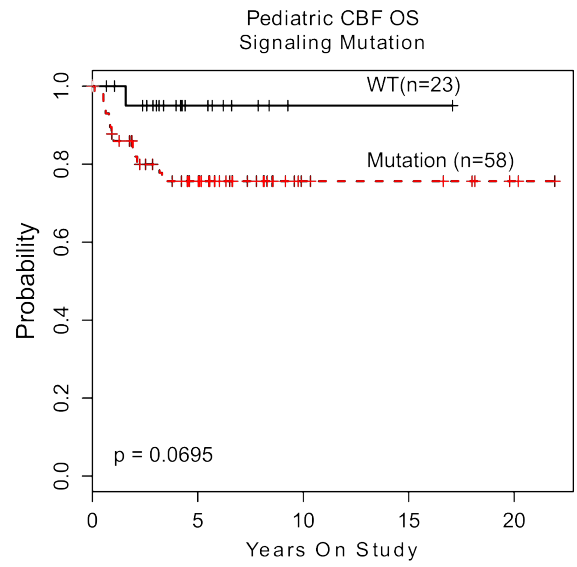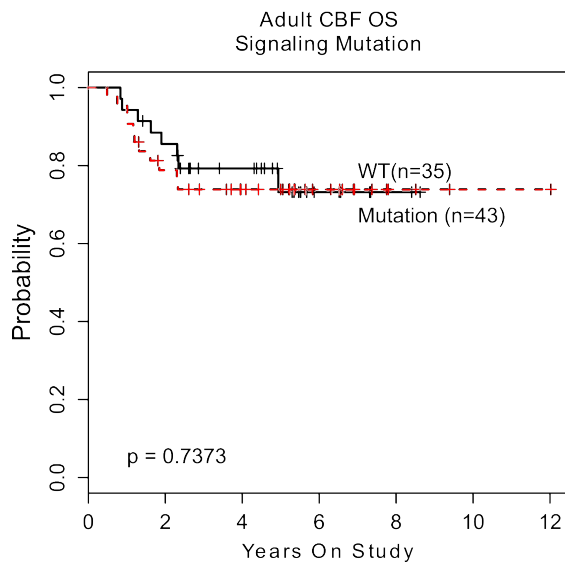

c)

Association of mutation with EFS in CBF-AML

| Mutation             | HR     | HR95CI        | P value | Log Rank P value |
|----------------------|--------|---------------|---------|------------------|
| <i>NRAS</i>          | 0.8731 | 0.4954-1.5387 | 0.6388  | 0.6380           |
| <i>KIT</i>           | 1.5541 | 0.8608-2.8058 | 0.1436  | 0.1388           |
| <i>KIT</i> (Exon 17) | 2.3150 | 1.2001-4.4657 | 0.0123  | 0.0097           |
| Any Signaling        | 1.1685 | 0.6823-2.0012 | 0.5704  | 0.5684           |

d)

Association of mutation with OS in CBF-AML

| Mutation             | HR     | HR95CI        | P value | Log Rank P value |
|----------------------|--------|---------------|---------|------------------|
| <i>NRAS</i>          | 0.9953 | 0.4685-2.1146 | 0.9903  | 0.9903           |
| <i>KIT</i>           | 1.6143 | 0.7482-3.4831 | 0.2223  | 0.2179           |
| <i>KIT</i> (Exon 17) | 2.5533 | 1.1001-5.9259 | 0.0291  | 0.0237           |
| Any Signaling        | 1.7185 | 0.7911-3.7329 | 0.1713  | 0.1665           |

e)

Multivariable Cox Model

|     | Predictor            | HR     | HR95CI        | P value |
|-----|----------------------|--------|---------------|---------|
| EFS | <i>KIT</i> (Exon 17) | 2.271  | 1.1514-4.4793 | 0.0179  |
|     | <i>RUNX1-RUNX1T1</i> | 1.1693 | 0.6893-1.9835 | 0.562   |
|     | Pediatric            | 0.4016 | 0.2304-0.6998 | 0.0013  |
| OS  | <i>KIT</i> (Exon 17) | 2.4096 | 1.0123-5.7358 | 0.0469  |
|     | <i>RUNX1-RUNX1T1</i> | 1.3684 | 0.6666-2.8093 | 0.3927  |
|     | Pediatric            | 0.7912 | 0.3946-1.5864 | 0.5094  |

**Supplementary Figure 7. Distribution of signaling mutations in CBF-AML subgroups.** Graphic representation of mutations in signaling genes in a) *RUNX1-RUNX1T1* and b) *CBFB-MYH11* CBF AML. c) Enrichment of mutations in each fusion cohort. P values calculated using Fisher's exact test.

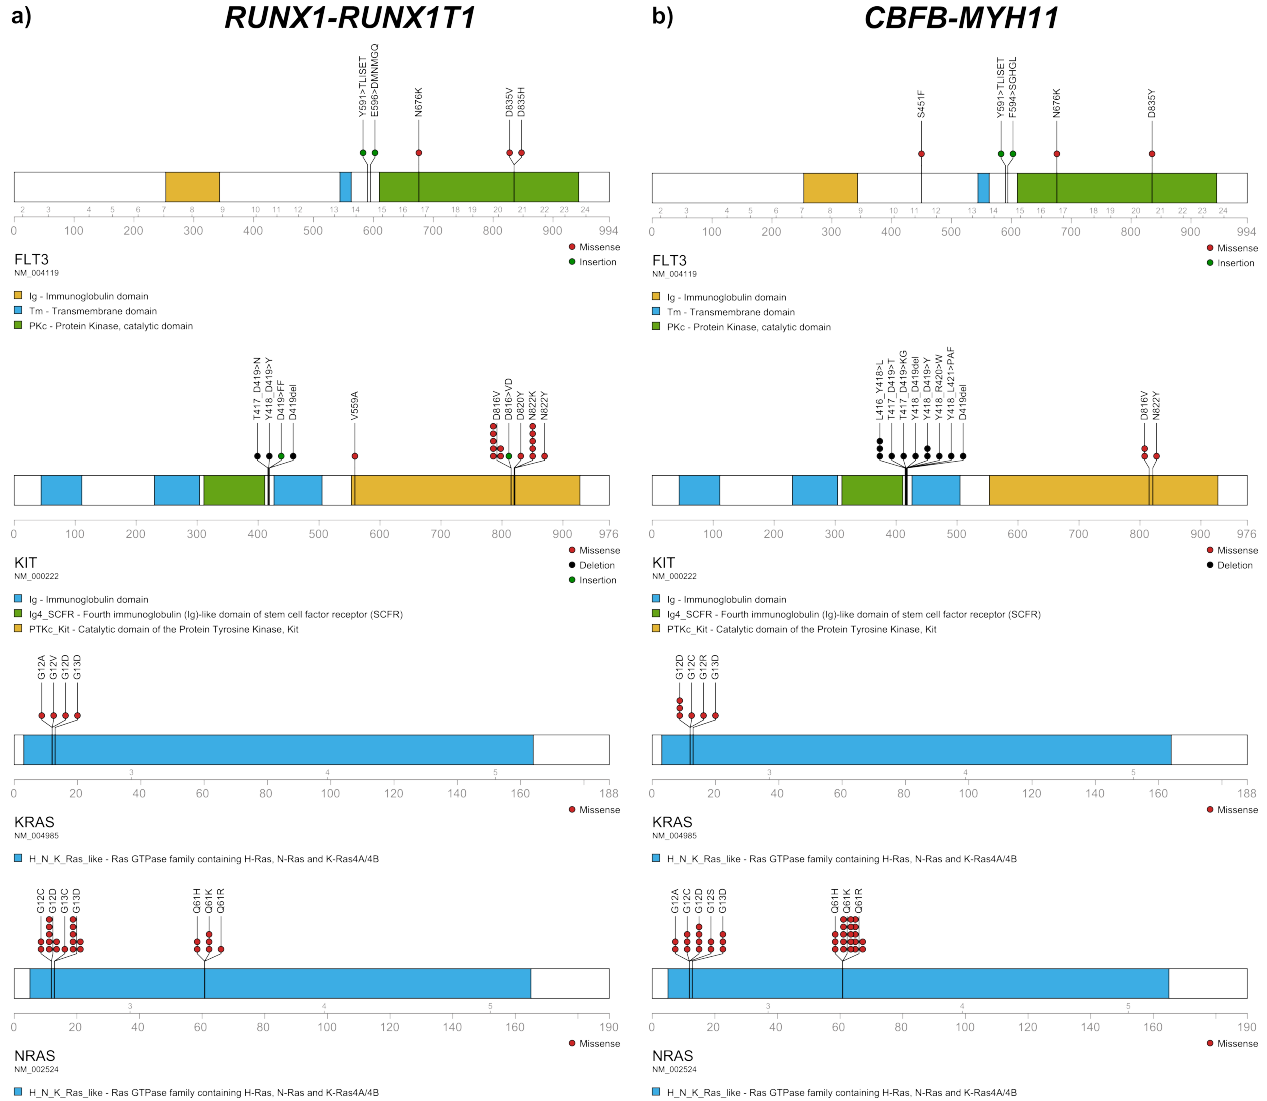

c)

| <b>Gene/Mutation</b>  | <b><i>RUNX1-RUNX1T1</i></b> | <b><i>CBFB-MYH11</i></b> | <b>p</b> |
|-----------------------|-----------------------------|--------------------------|----------|
| <i>FLT3</i>           | 5                           | 5                        | 1.00     |
| <i>FLT3</i> -ITD      | 2                           | 2                        | 0.99     |
| <i>FLT3</i> -TKD      | 3                           | 2                        | 0.9871   |
| <i>FLT3</i> other     | 0                           | 1                        | 0.7869   |
| <i>KRAS</i>           | 5                           | 5                        | 1.00     |
| <i>NRAS</i> (total)   | 22                          | 34                       | 0.032    |
| <i>NRAS</i> (G12/G13) | 16                          | 14                       | 0.843    |
| <i>NRAS</i> (Q61)     | 6                           | 20                       | 0.0023   |
| <i>KIT</i> (total)    | 23                          | 15                       | 0.267    |
| <i>KIT</i> (exon 8)   | 4                           | 11                       | 0.057    |
| <i>KIT</i> (exon 17)  | 15                          | 3                        | 0.0051   |

**Supplementary Figure 8. Impact of *NRAS* mutations on outcome in CBF-AML.** Mutations in *NRAS* had no effect on outcome in pediatric or adult patients in either *RUNX1-RUNX1T1* or *CBFB-MYH11* leukemia. P values correspond to log rank tests.

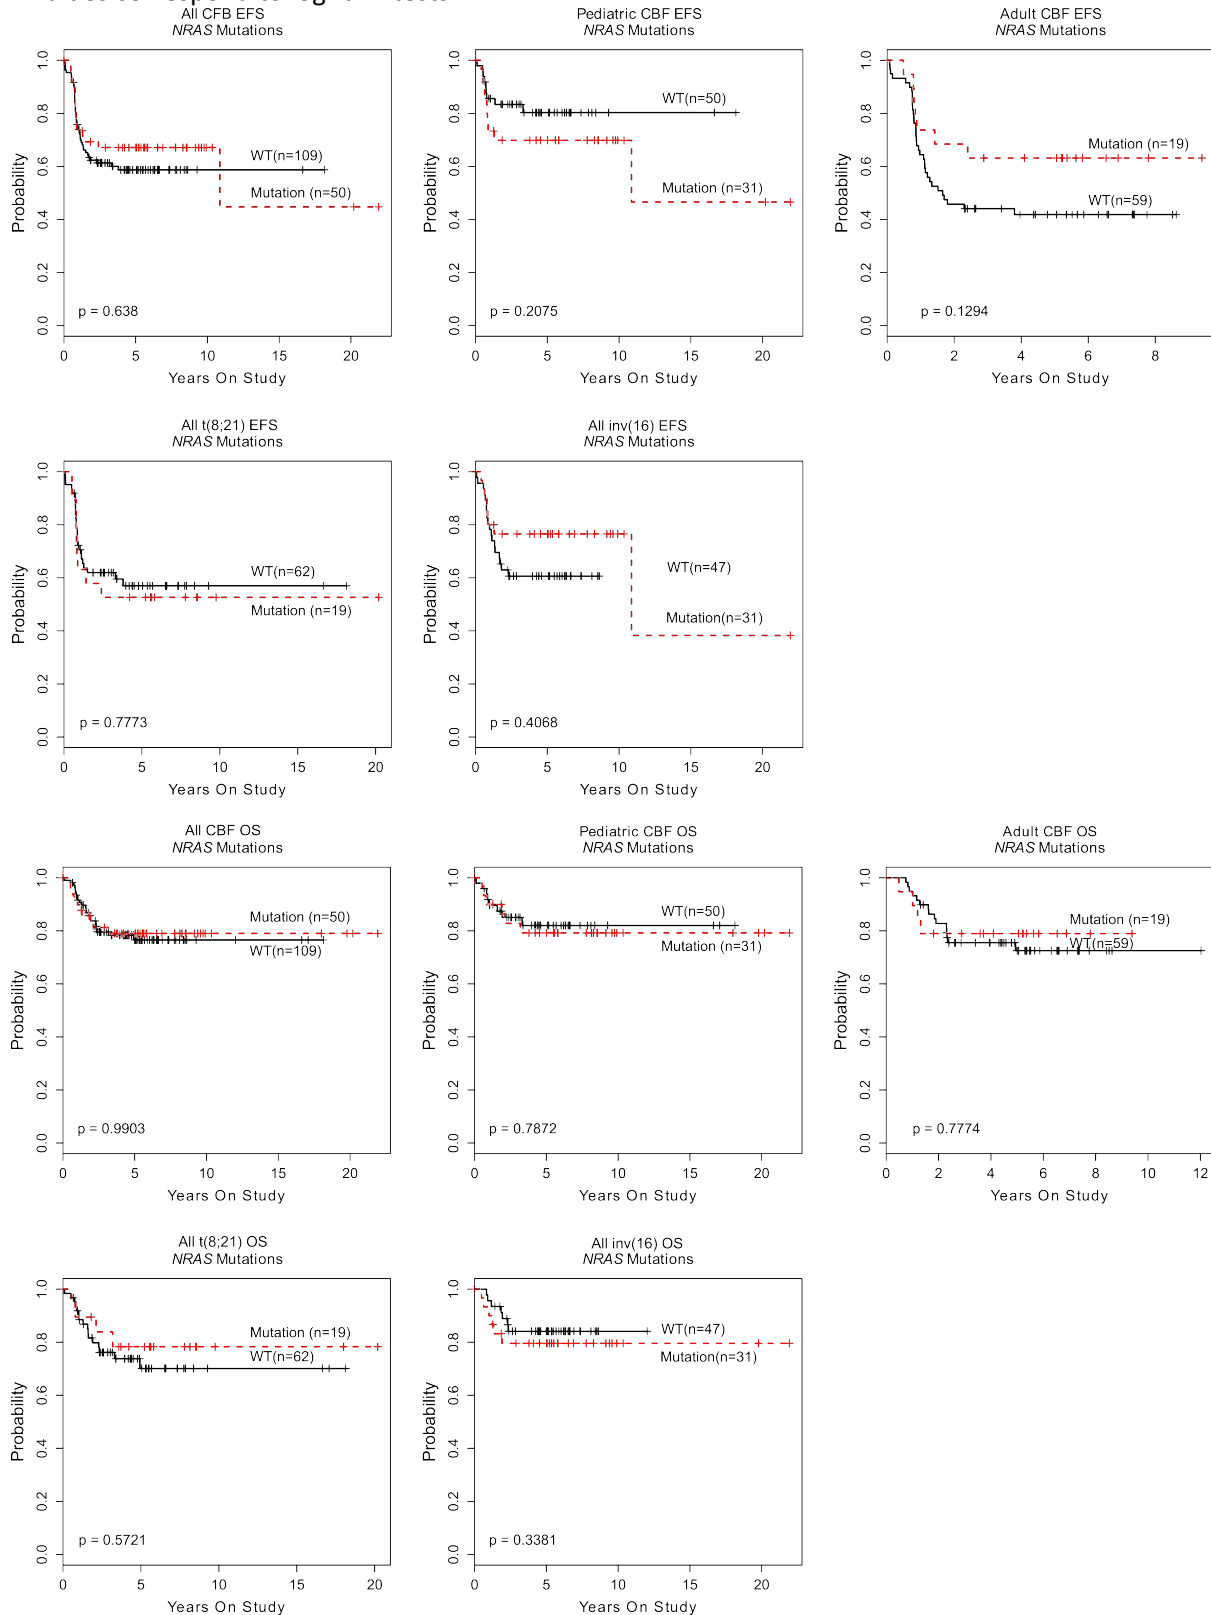

**Supplementary Figure 9. Impact of KIT mutations on outcome in CBF-AML.**

a) Outcome analysis of CBF patients in our cohort based on the presence of any *KIT* mutation. b) Patients with an exon 17 *KIT* mutation have a worse outcome. P values correspond to log rank tests.

a)

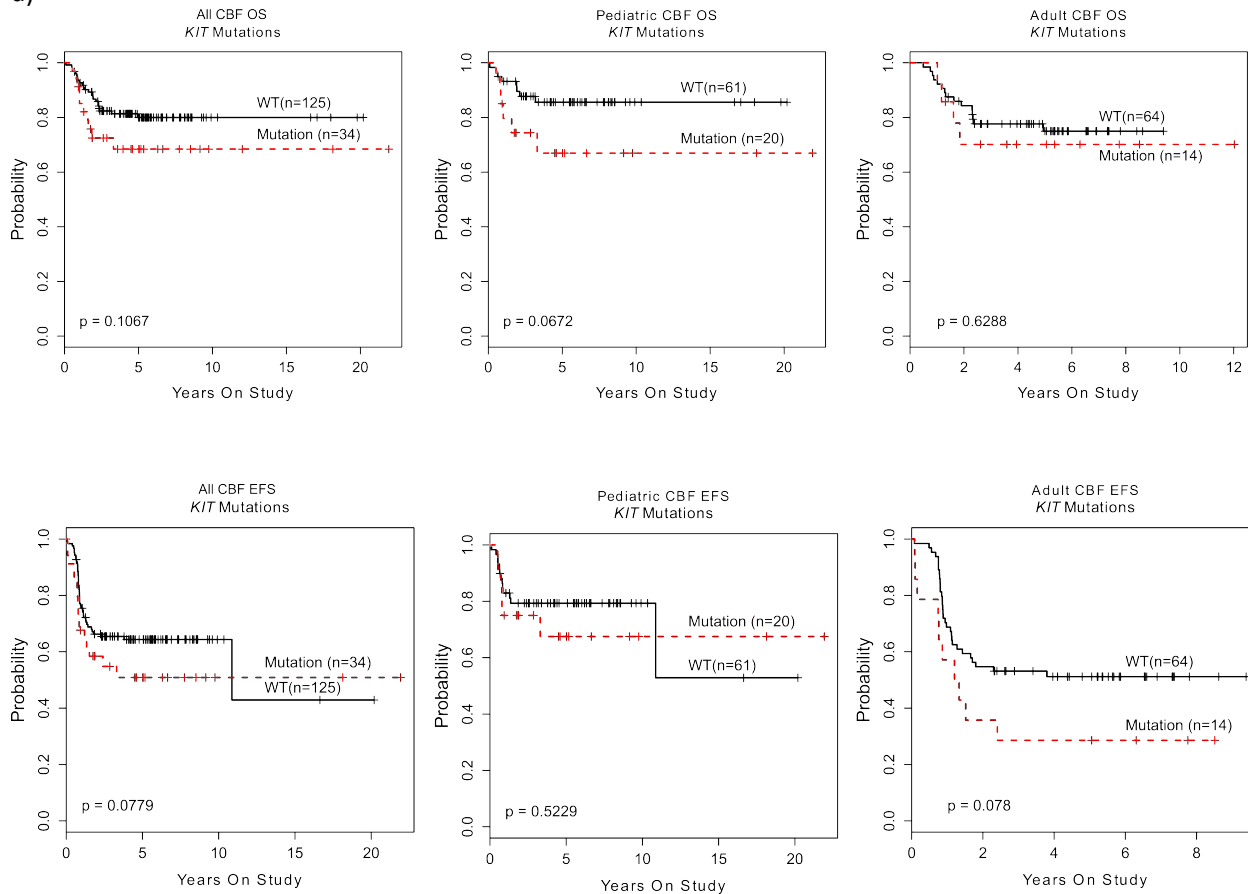

b)

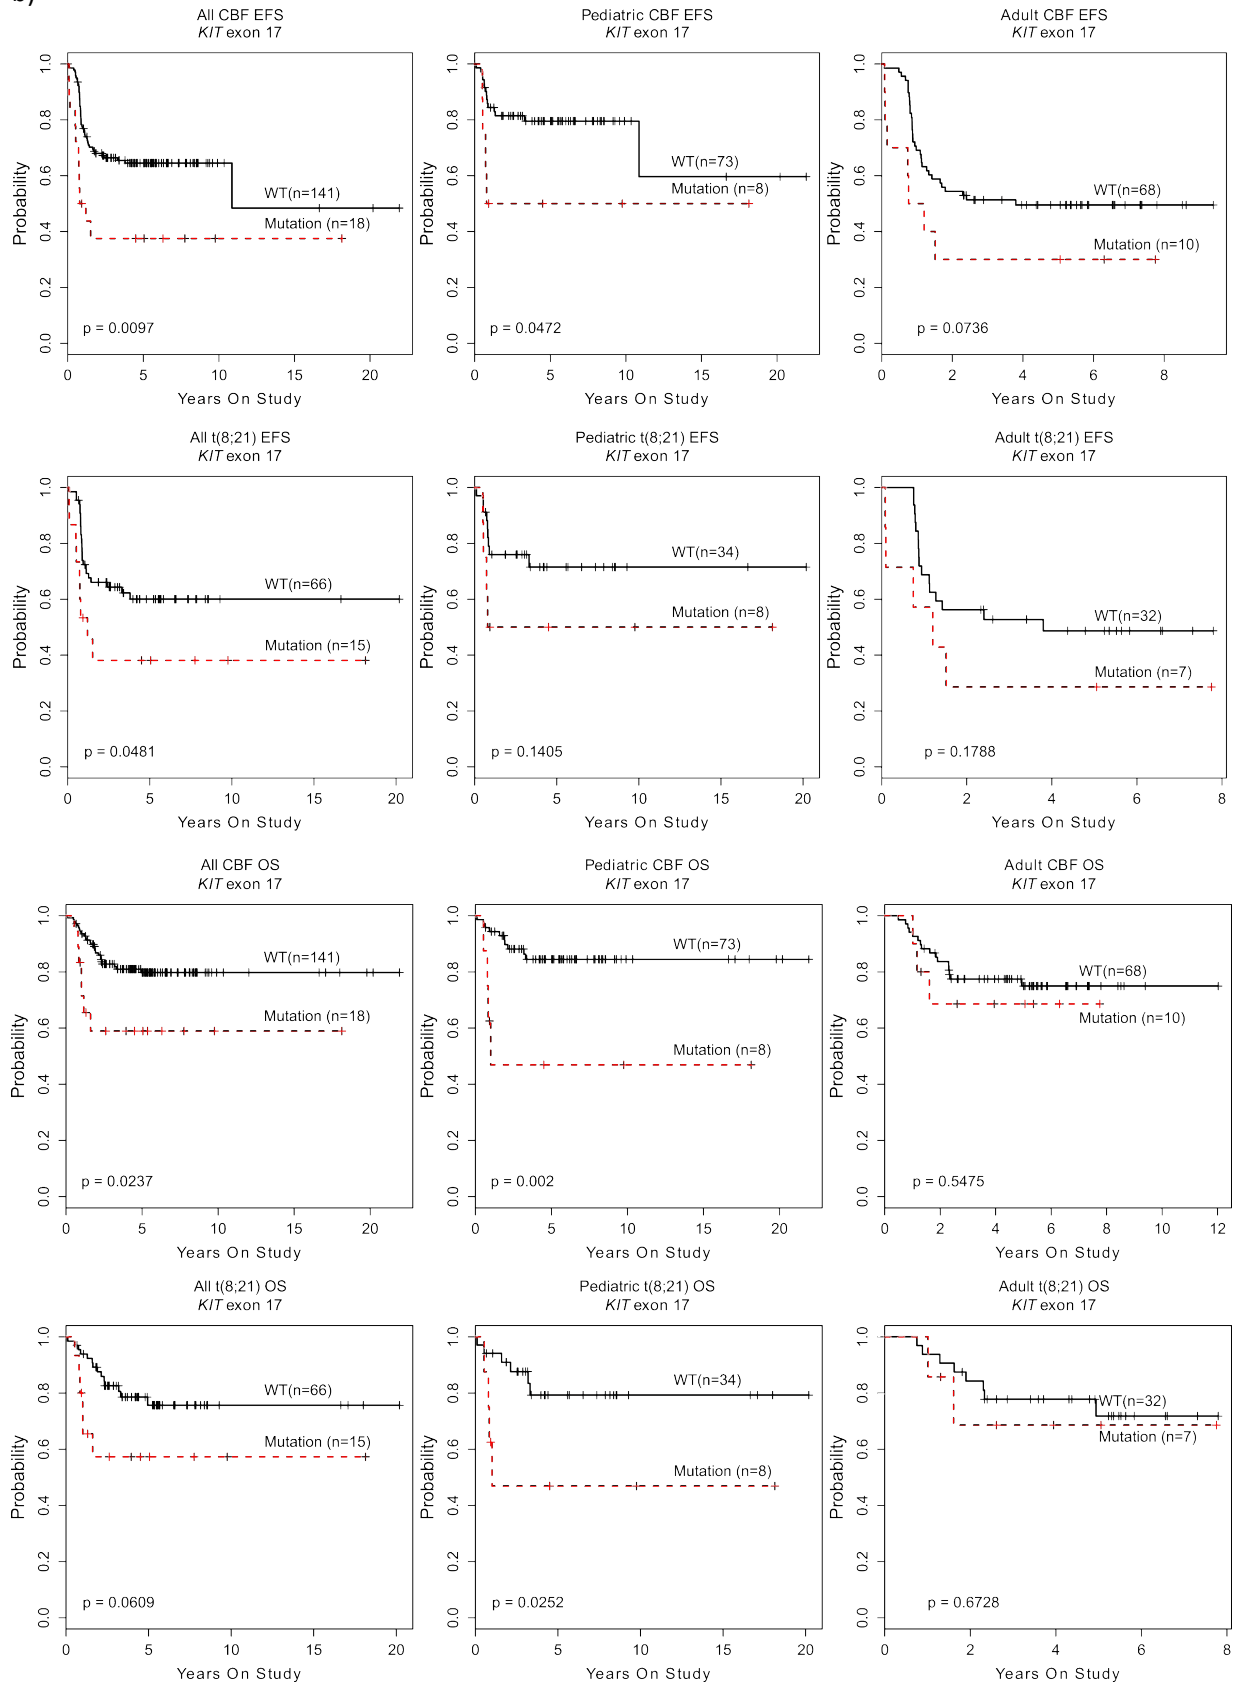

**Supplementary Figure 10. CCND2 stabilization.** (a) Alignment of CCND2 amino acid sequence across human, mouse, and zebrafish highlights the sequence conservation near residue T280. (b) Quantification of CCND2 levels. Mean + s.d. shown (n=3). \* P < 0.05, two-tailed unpaired Student's t-test (P281R vs WT 120 minutes – p=0.029, t=3.334, df=4, P281R vs WT 240 minutes – p=0.0185, t=3.8362, df=4). (c) Full size western blots for CCND2 stabilization.

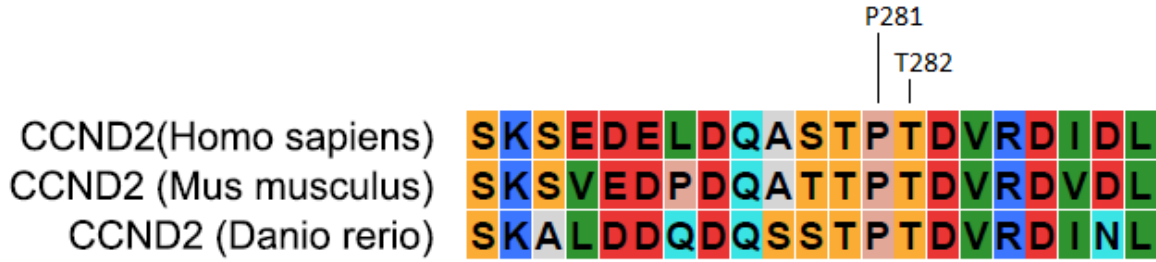

b)

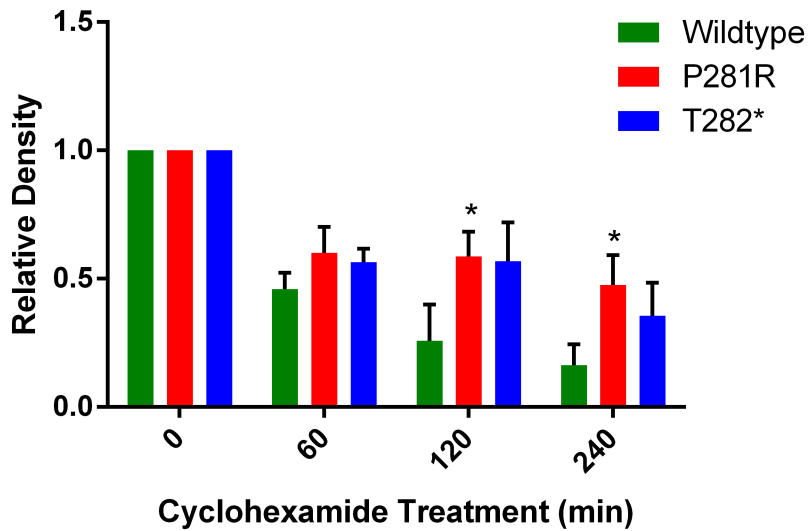

c)



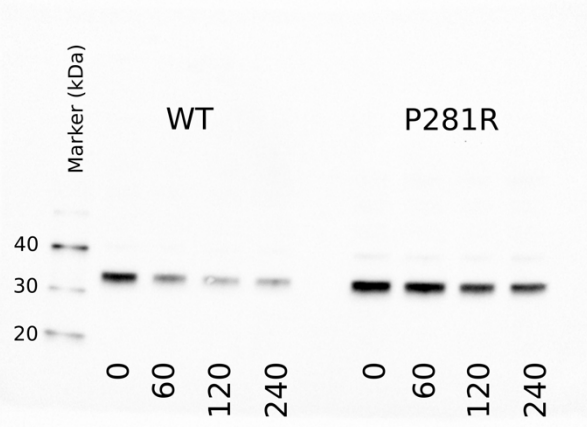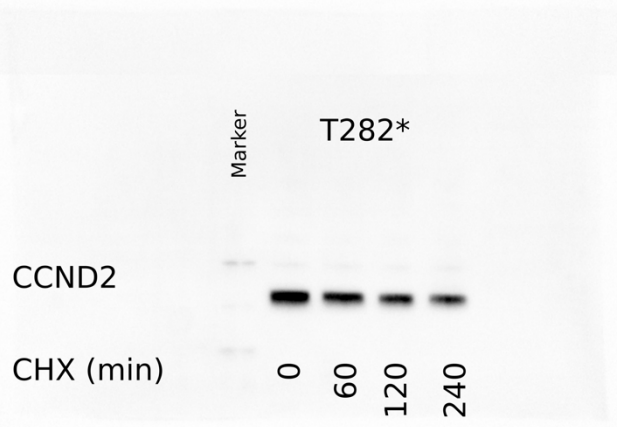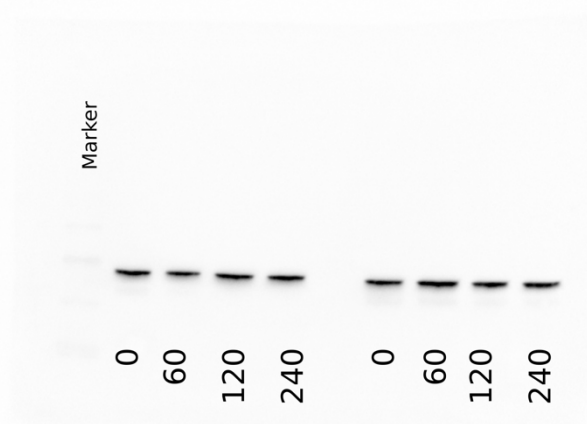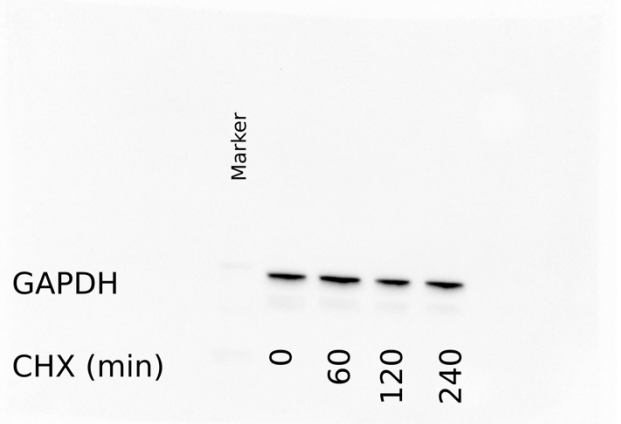

**Supplementary Figure 11. DHX15 p. R222G mutation in CBF-AML.** A structural model of yeast homologue of DHX15 (Prp43:PDB 2XAU) with the location of the R222G mutation highlighted by a black arrow. Other domains are colored as follows: N-terminal, green; Rec1A, teal; Rec2A, blue; WH, orange; ratchet, yellow; c-terminal/OG, red. The protein is shown with bound ADP.

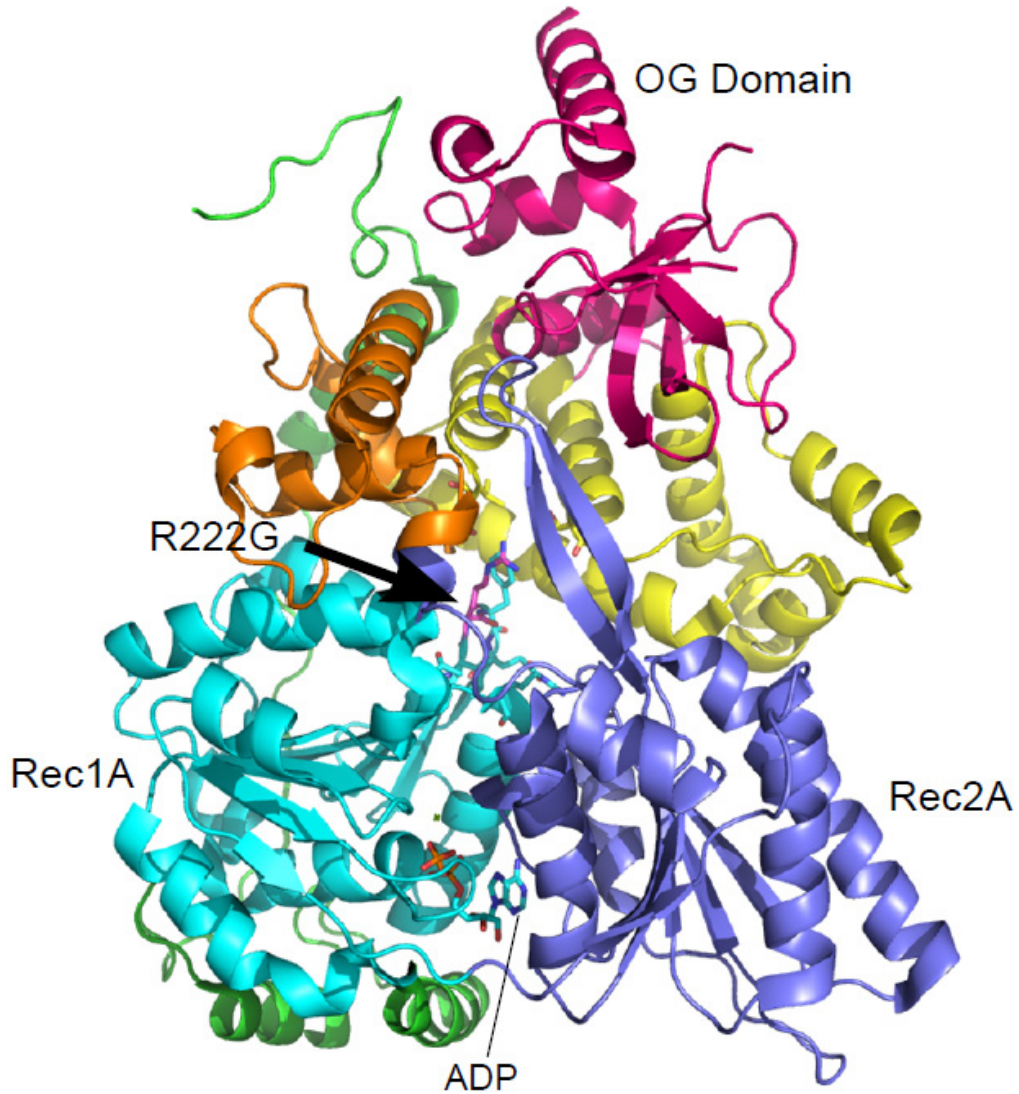

**Supplementary Figure 12. Gene Set Enrichment Analysis of DHX15 depleted cells.** siRNA-mediated depletion of DHX15 leads to differential expression of genes involved in a) mRNA splicing and b) ribosome biogenesis.

a)

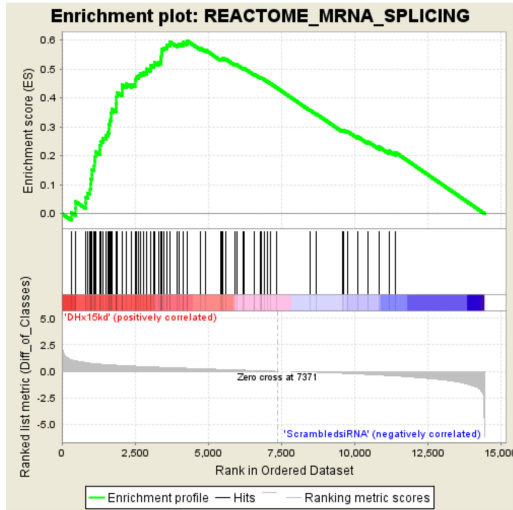

NES: 2.609  
FDR q-value: 0.0

b)

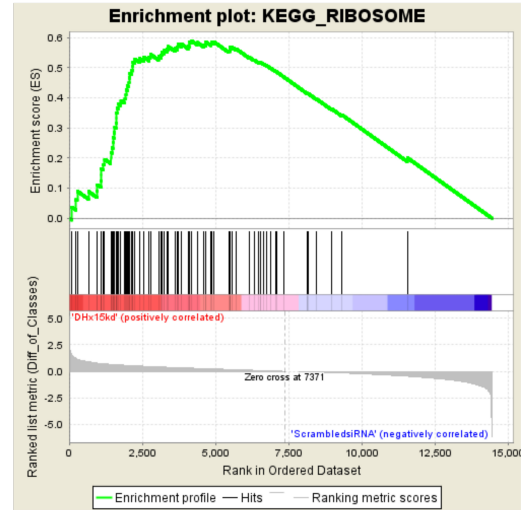

NES: 2.498  
FDR q-value: 0.0

**Supplementary Figure 13. Mutations in epigenetic regulators found in CBF-AML.** Graphical representation of the mutations found in a) *CREBBP*, b) *KDM6A*, c) *EED*, d) *SETD2*, e) *KMT2D*, f) *KMT2C*, g) *EZH2*, and h) *ASXL2*.

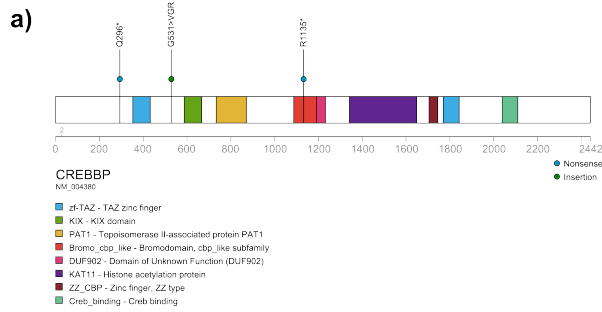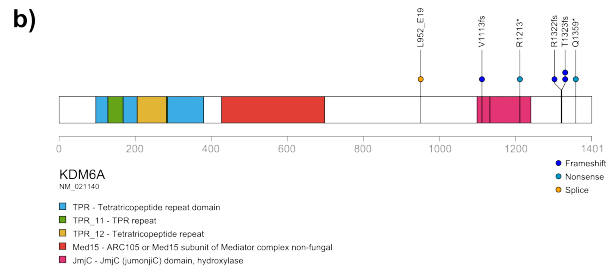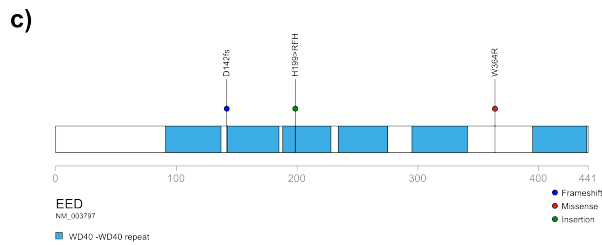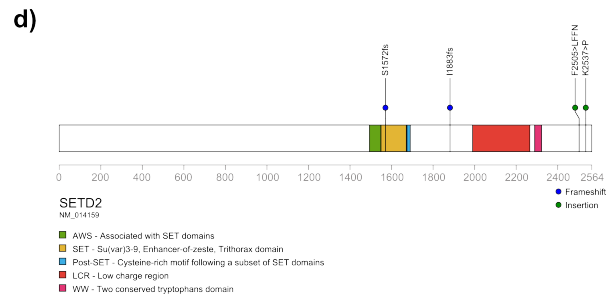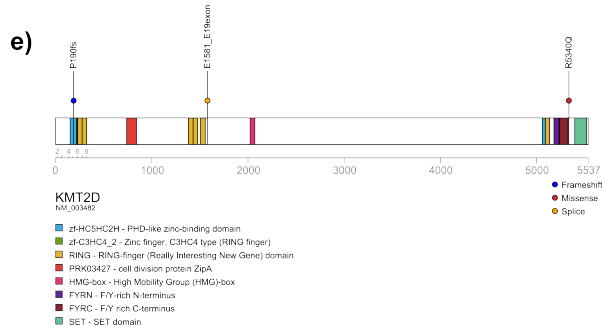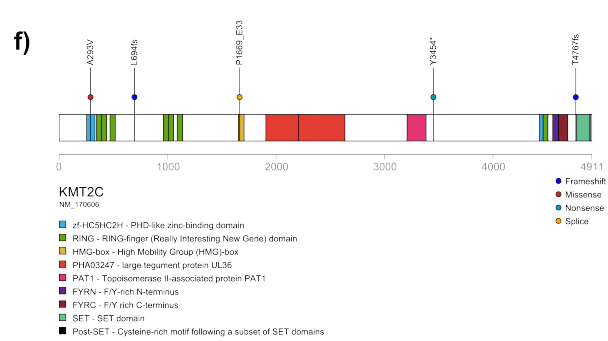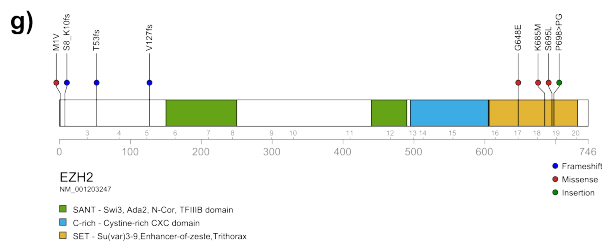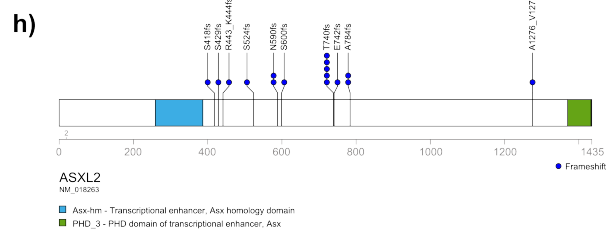

**Supplementary Figure 14. Impact of ASXL2 mutations on outcome in *RUNX1-RUNX1T1* rearranged CBF-AML.** Mutations in *ASXL2* are not significantly correlated with outcome in CBF-AML. P values correspond to log rank tests.

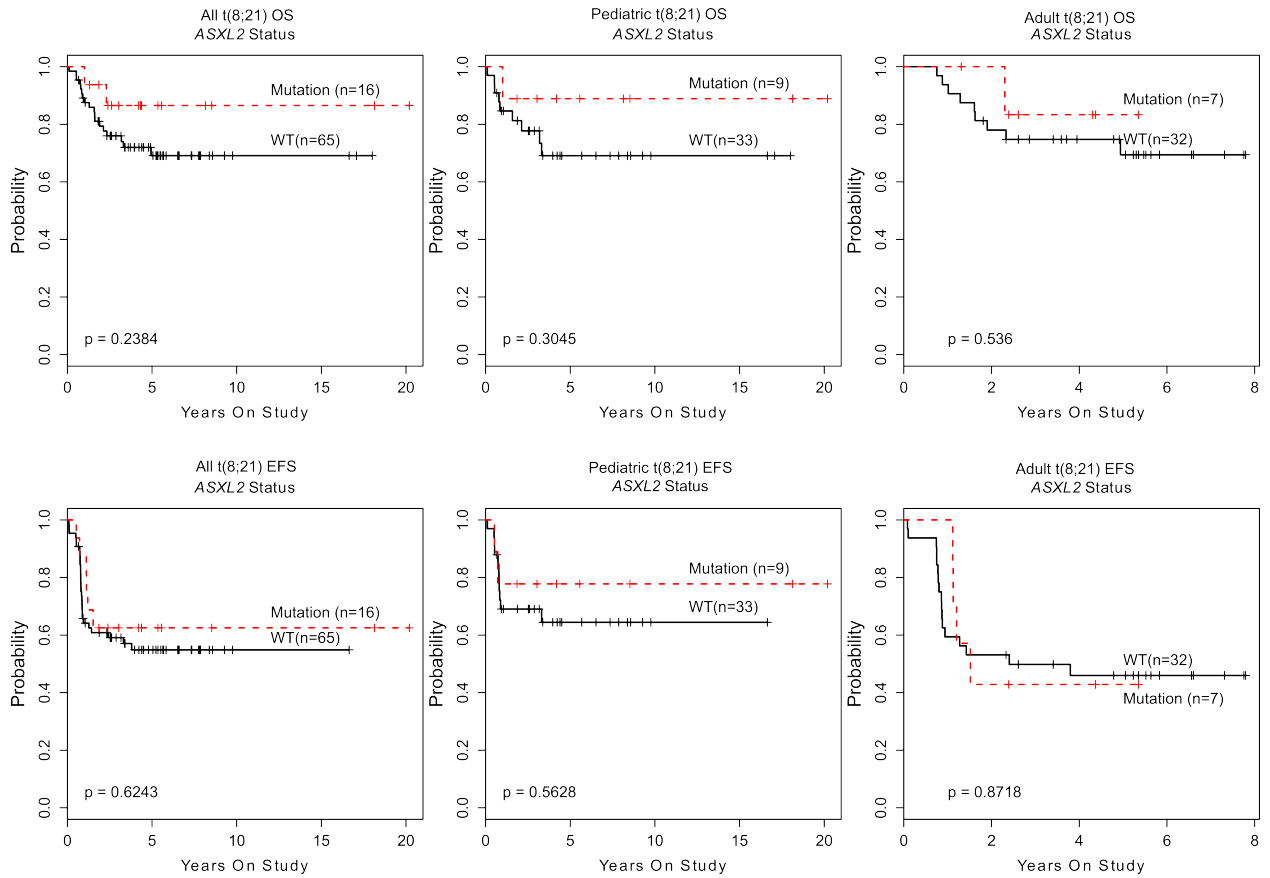

**Supplementary Figure 15. ASXL2 mutations alter myeloid differentiation.** Lineage depleted mouse bone marrow cells were transduced with the indicated murine stem cell virus (MSCV) ires mCherry based vectors. After sorting for mCherry positive cells, cultures were grown for 14 days in cytokine-enriched media. Representative (of three independent experiments) day 14 FACS plots are shown indicating an increase in cKit/Sca1 double positive cells as well as an increase in Mac1/Gr1 double negative cells.

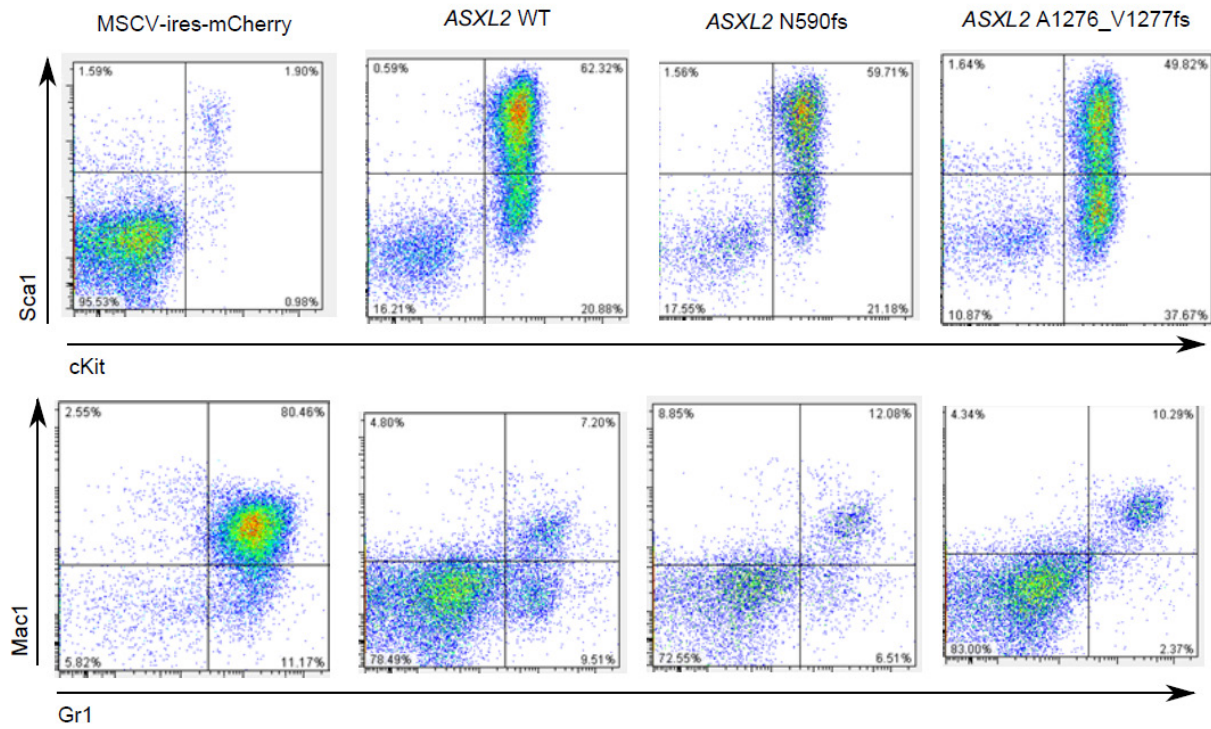

**Supplementary Figure 16. Exon coverage of ASXL1.** The coverage level of each exon of ASXL1 is shown as well as average coverage over all exons for WES cases. The coverage in exon 12, which frequently harbors somatic mutations, is 80.7x. Exons 1 and 7 of ASXL1 have high GC content (0.77 and 0.71, respectively), which explains their low coverage.

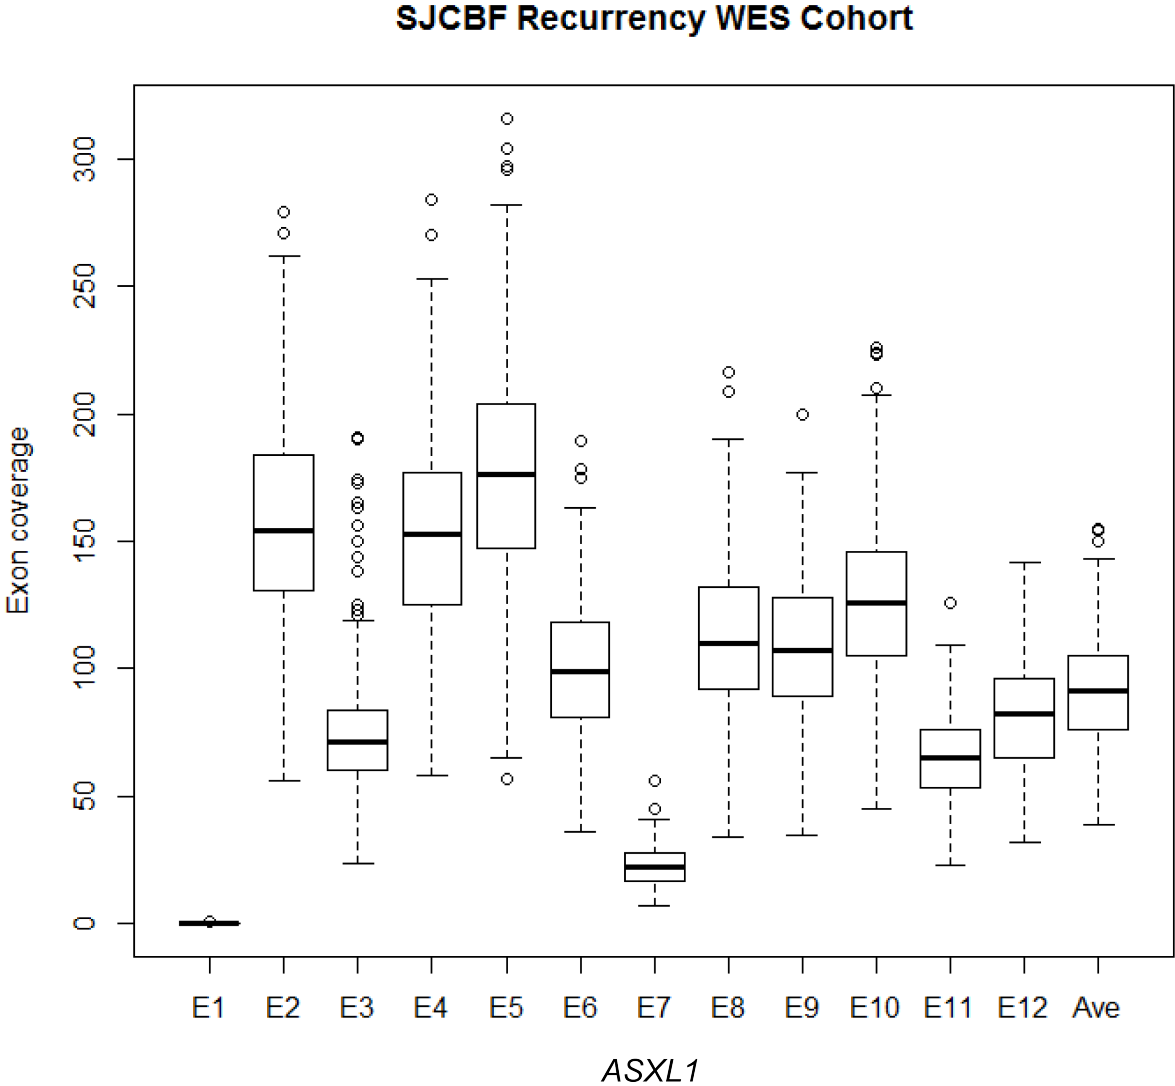

**Supplementary Figure 17. Cohesin mutations in CBF-AML.** Representative diagrams of the mutations found in a) *SMC1A*, b) *SMC3*, and c) *RAD21*.

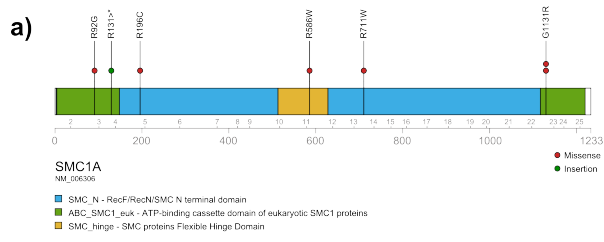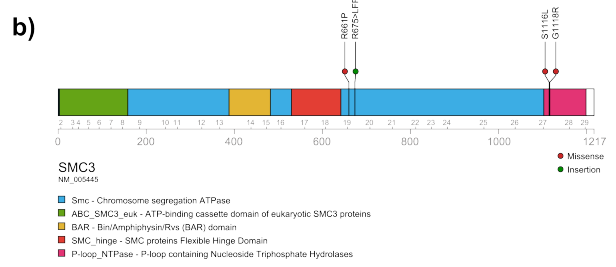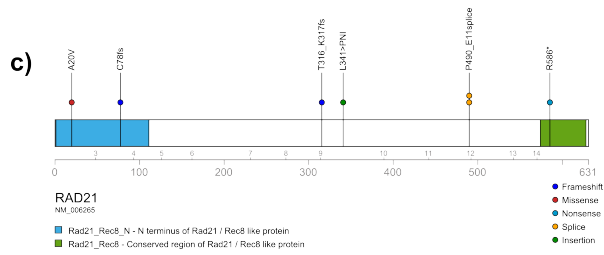



**Supplementary Figure 18. Impact of cohesin mutations on outcome in CBF-AML.** Mutations in *SMC1A*, *SMC3*, or *RAD21* had no effect on outcome in pediatric or adult patients in either *RUNX1-RUNX1T1* or *CBFB-MYH11* leukemia. P values correspond to log rank tests.

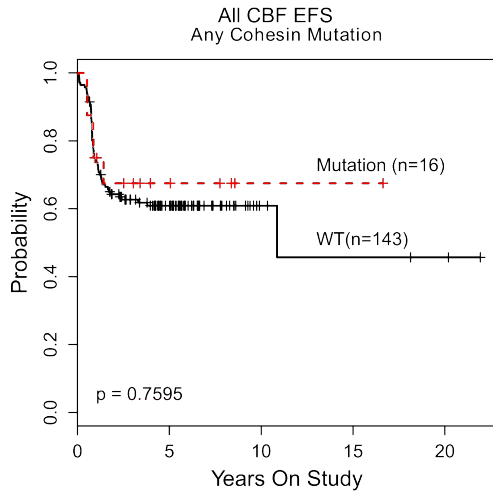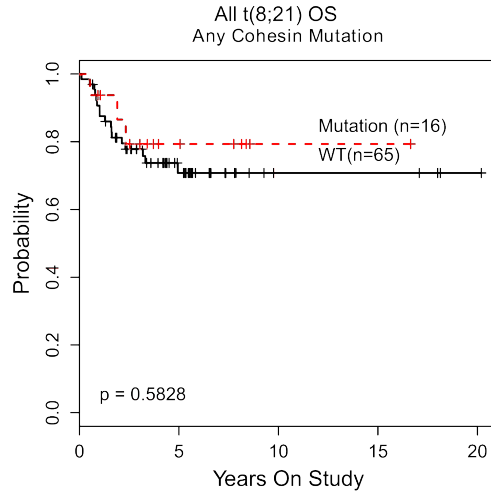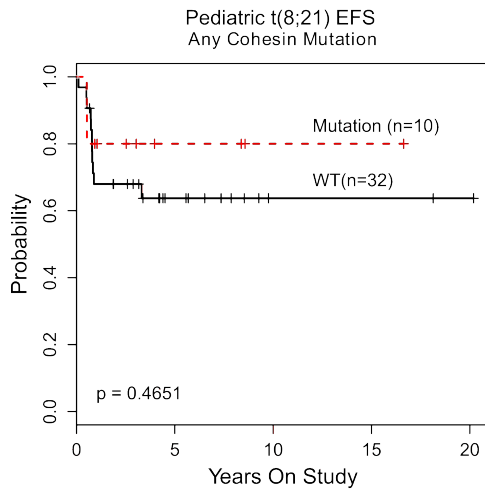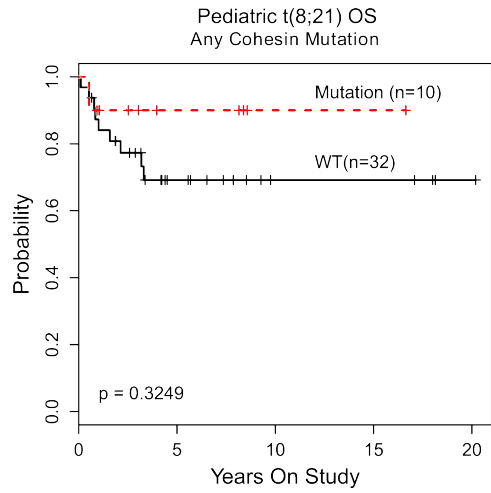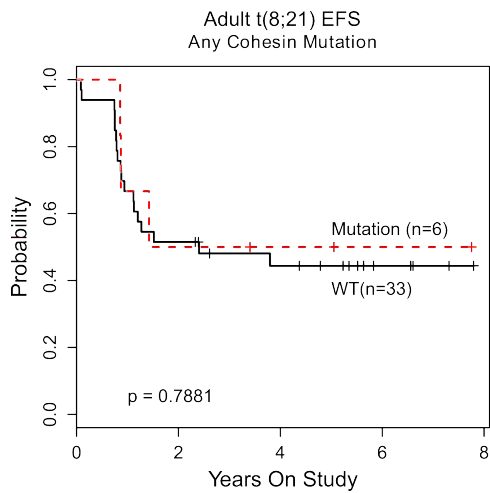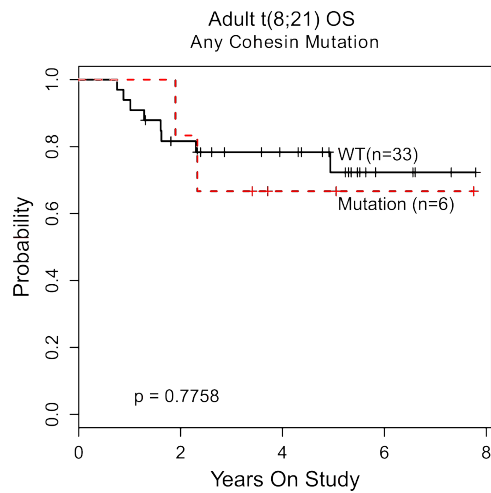

**Supplementary Figure 19. ZBTB7A mutations in CBF AML.** Graphical representation of the mutations found in ZBTB7A.

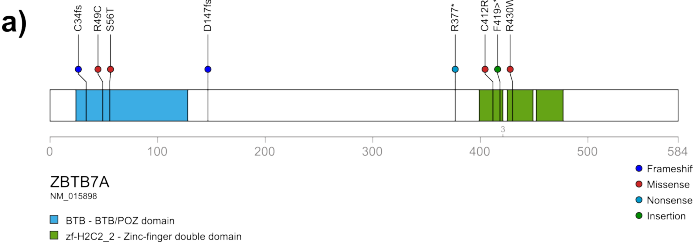

**Supplementary Figure 20: Gene set enrichment analysis.** Comparison of transcriptome analysis with previously published array data of CBF leukemia showed similar a) *RUNX1-RUNX1T1* and b) *CBFB-MYH11* gene signatures.

a)

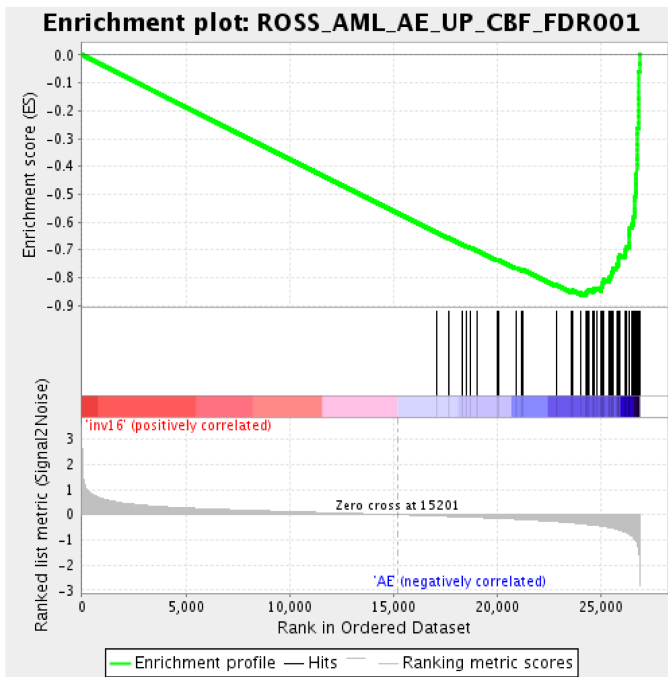

b)

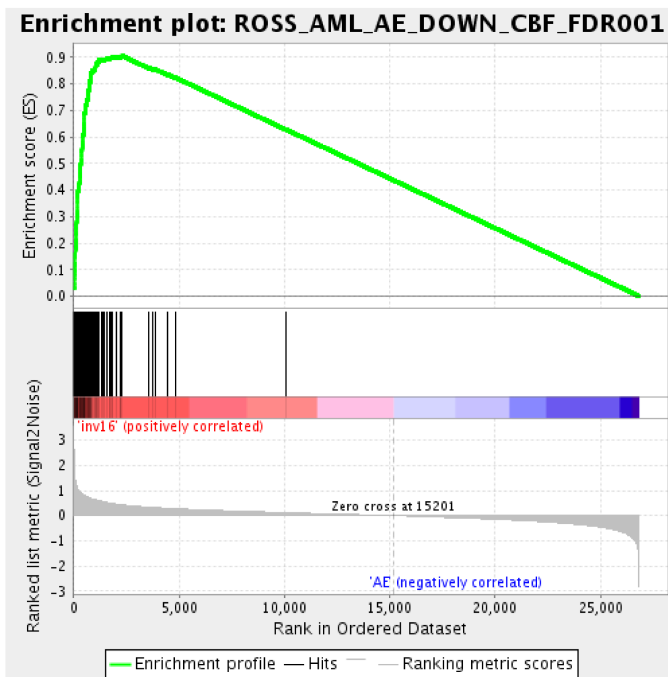

**Supplementary Figure 21: The 9a isoform of *RUNX1T1* was detected in all cases of *RUNX1-RUNX1T1* CBF leukemia. The alternatively spliced 9a isoform could be detected in our transcriptome analysis. a) The location of the 9a exon is indicated by the red box. b) The fraction of reads supporting the 8-9a junction is shown for each case.**

a)

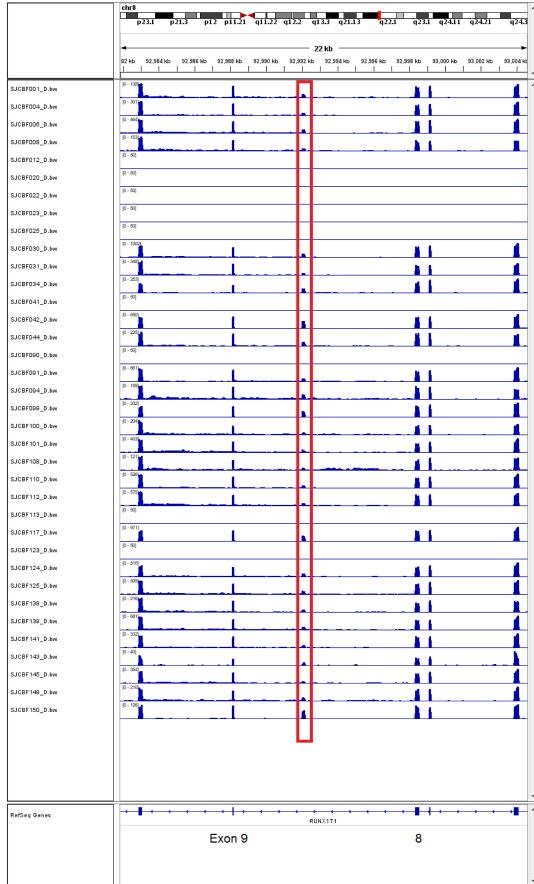

b)

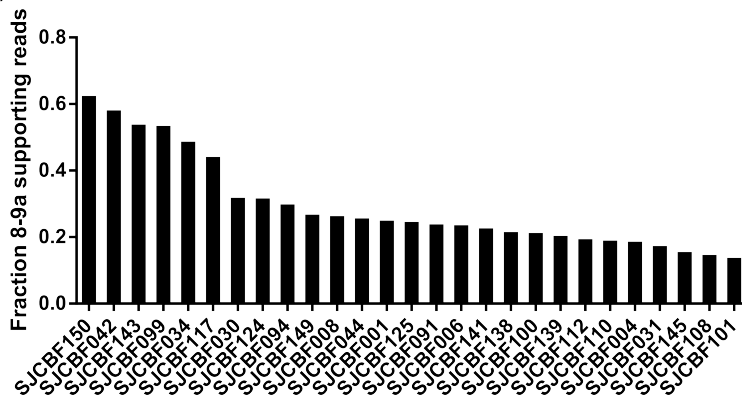

**Supplementary Figure 22. Clonal evolution between diagnosis and relapse in CBF-AML.** a) *De novo* tumor (red) and relapse (blue) MAFs are shown for each individual case. All validated variants are shown and were sequenced after PCR amplification to a median coverage of >25000x. b) Copy number analysis of the paired samples shows differences between the diagnosis and relapsed sample.

**a)**

SJCBF028

| Mutant         | MAF_D | MAF_R |
|----------------|-------|-------|
| TGM2_E13_UTR_3 | 0.45  | 0.32  |
| UBE2W_E7_UTR_3 | 0.45  | 0.26  |
| KRAS_G13D      | 0.42  | 0.28  |
| KIT_N822K      | 0.16  | 0.00  |
| EPS8L1_G537R   | 0.00  | 0.28  |
| CDHR1_V713M    | 0.00  | 0.25  |
| PTPRE_D488E    | 0.01  | 0.22  |
| COL7A1_Q246*   | 0.00  | 0.21  |

SJCBF030

| Mutant           | MAF_D | MAF_R |
|------------------|-------|-------|
| ZBTB47_D277E     | 0.52  | 0.30  |
| FAM81B_F23S      | 0.50  | 0.28  |
| ASXL2_N590fs     | 0.49  | 0.27  |
| CCND2_T282*      | 0.38  | 0.33  |
| KIT_N822K        | 0.18  | 0.29  |
| SPOCK1_E11_UTR_3 | 0.17  | 0.02  |
| DDR GK1_E255D    | 0.15  | 0.00  |
| KIT_Y418_D419>Y  | 0.11  | 0.01  |
| RASSF2_E12_UTR_3 | 0.00  | 0.21  |
| RUNX1_C81R       | 0.00  | 0.26  |

SJCBF043

| Mutant        | MAF_D | MAF_R |
|---------------|-------|-------|
| CHFR_G531S    | 0.45  | 0.40  |
| EPHB4_Y467Y   | 0.52  | 0.41  |
| DSG1_R26Q     | 0.44  | 0.39  |
| CCND2_P281A   | 0.43  | 0.00  |
| RUVBL1_E389D  | 0.38  | 0.00  |
| NRAS_G12C     | 0.23  | 0.00  |
| COL3A1_R1434C | 0.00  | 0.39  |
| PIP5K1A_G504V | 0.00  | 0.36  |
| EPHA6_A380S   | 0.00  | 0.35  |
| WDR46_Y28*    | 0.00  | 0.31  |

SJCBF044

| Mutant           | MAF_D | MAF_R |
|------------------|-------|-------|
| CUL9_R1211C      | 0.52  | 0.42  |
| DHX15_R222G      | 0.51  | 0.44  |
| KMT2C_E33_splice | 0.34  | 0.38  |
| ATRX_E1_UTR_5    | 0.35  | 0.21  |
| GRIK2_A657T      | 0.18  | 0.00  |
| MGA_F907fs       | 0.11  | 0.00  |
| SMC5_E25_UTR_3   | 0.00  | 0.50  |
| KIT_D816Y        | 0.01  | 0.47  |
| ASXL1_G710fs     | 0.00  | 0.22  |
| DAG1_R371W       | 0.00  | 0.13  |

SJCBF078

| Mutant            | MAF_D | MAF_R |
|-------------------|-------|-------|
| NXT2_E5_UTR_3     | 0.95  | 0.00  |
| DHX15_R222G       | 0.43  | 0.00  |
| NUDT16L1_E3_UTR_3 | 0.43  | 0.00  |
| HTR1A_C109C       | 0.39  | 0.00  |

SJCBF155

| Mutant         | MAF_D | MAF_R |
|----------------|-------|-------|
| BMP7_R157L     | 0.53  | 0.58  |
| ADAM18_N711K   | 0.46  | 0.51  |
| ELOVL3_S217C   | 0.42  | 0.49  |
| RPS6KA4_V295V  | 0.11  | 0.45  |
| KIT_D812V      | 0.07  | 0.49  |
| ABCBI_I1158F   | 0.22  | 0.00  |
| SRD5A2_R168C   | 0.19  | 0.00  |
| PDK4_E11_UTR_3 | 0.17  | 0.00  |
| SH2B3_E8_UTR_3 | 0.00  | 0.48  |
| TET2_F1104fs   | 0.00  | 0.36  |

SJCBF165

| Mutant           | MAF_D | MAF_R |
|------------------|-------|-------|
| CCDC88A_D399V    | 0.45  | 0.33  |
| PCDH14_E137*     | 0.44  | 0.31  |
| PLCE1_F839F      | 0.43  | 0.01  |
| GLUL_E7_UTR_3    | 0.24  | 0.00  |
| EXD3_E2_UTR_5    | 0.20  | 0.00  |
| NEBL_G465V       | 0.19  | 0.00  |
| KDM6A_T1323fs    | 0.02  | 0.00  |
| RABEP1_E18_UTR_3 | 0.09  | 0.27  |
| NMS_W130*        | 0.06  | 0.29  |
| ZBTB7A_A205fs    | 0.07  | 0.00  |

SJCBF174

| Mutant             | MAF_D | MAF_R |
|--------------------|-------|-------|
| COL11A1_T905I      | 0.47  | 0.38  |
| GUCY1A2_K516N      | 0.45  | 0.39  |
| ATG2B_D1013N       | 0.44  | 0.38  |
| PHIP_E40_UTR_3     | 0.43  | 0.20  |
| KIT_D812>VD        | 0.23  | 0.20  |
| MEIS2_W326*        | 0.00  | 0.44  |
| LRRC3_R38P         | 0.00  | 0.41  |
| SIN3A_Y325C        | 0.00  | 0.39  |
| APTX_E9_UTR_3      | 0.00  | 0.35  |
| ARHGAP30_E12_UTR_3 | 0.00  | 0.16  |

b)

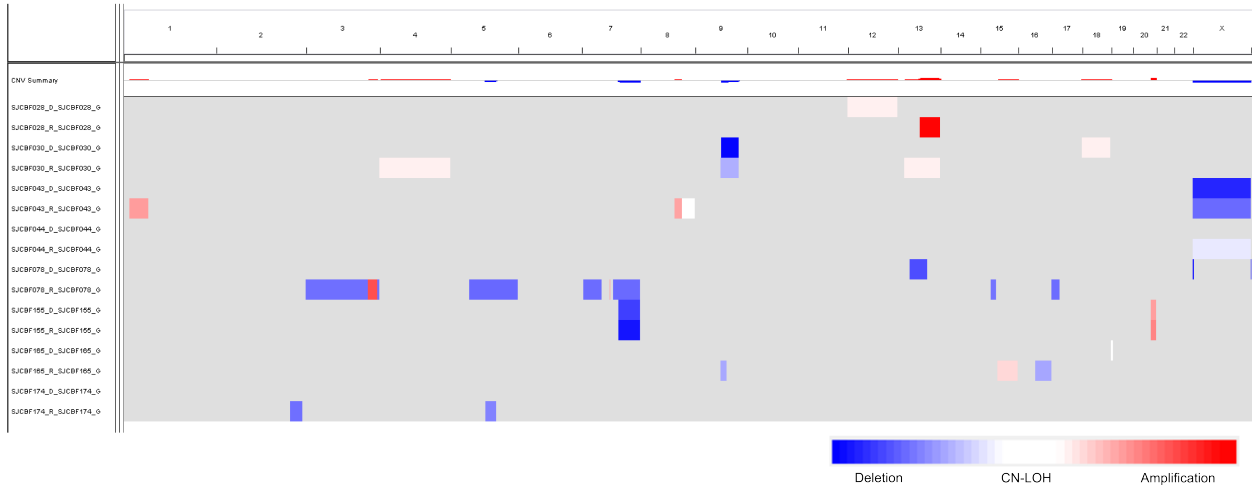

**Supplementary Figure 23. CBF AML mutation spectrum vs TCGA AMLs.** The mutation status of the recurrently mutated genes reported in this study was compared to the 182 cases of non-CBF AML in the TCGA data set. The percentage of cases within the entire cohort with a mutation in the given gene is displayed.

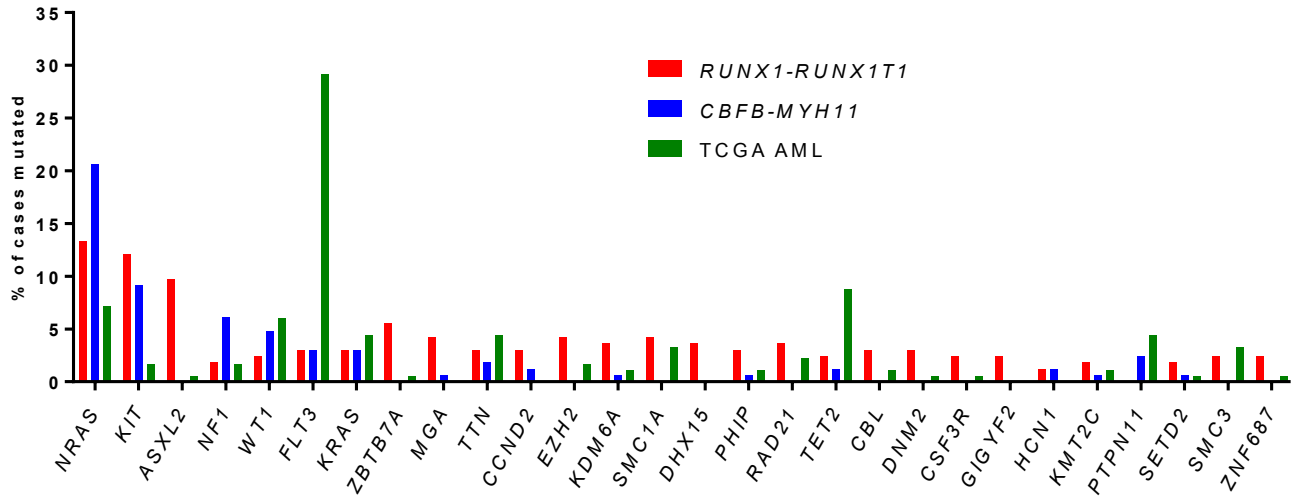



**Supplementary Figure 24. CoIP full length blots.**

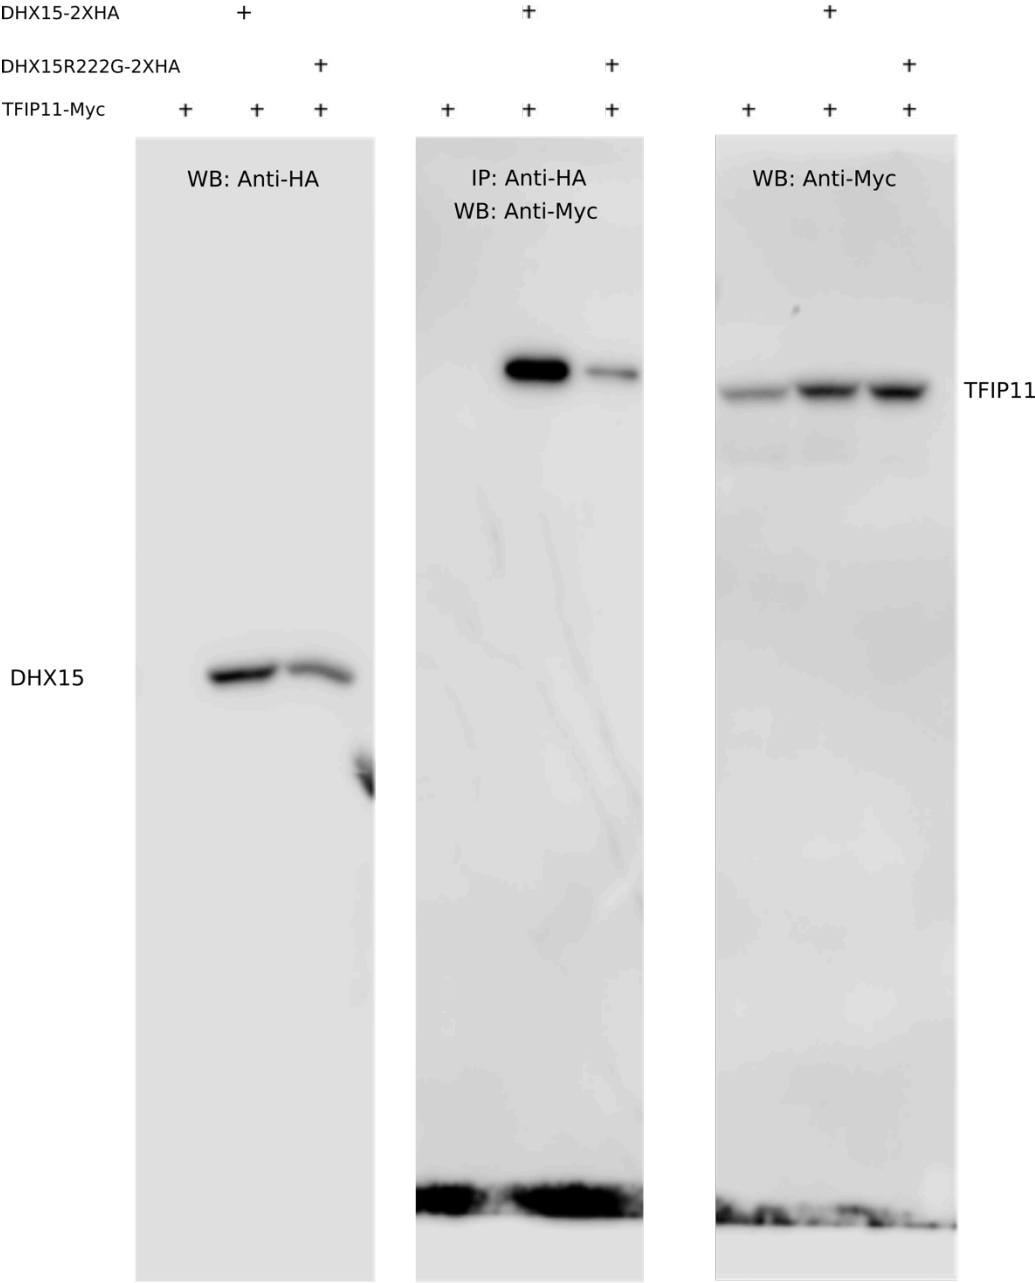

## Supplementary Tables

Supplementary Table 1: Clinical information for all 165 sequenced tumor samples. D, G, and R indicate diagnosis, germline, and relapse samples respectively.

Supplementary Table 2: Coding region SNVs per case of CBF-AML

Supplementary Table 3: Coverage data for WGS cohort

Supplementary Table 4: Coverage data for WES cohort

Supplementary Table 5: Validated mutations found in the 17 WGS cases

GeneName: HUGO gene name  
VarType: SUB – substitution, INDEL – insertion or deletion  
SJQuality: mutation quality score  
Sample: sample identifier  
Fusion: AE – *RUNX1-RUNX1T1*, inv(16) – *CBFB-MYH11*  
Chr: Chromosome  
WU\_HG19\_Pos: nucleotide position in hg19  
Class: mutation class  
AAChange: amino acid change resulting from the mutation  
ProteinGI: NCBI protein GI number  
mRNA\_acc: RefSeq mRNA accession number  
#Mutant\_in\_Tumor: number of sequencing reads containing the mutation in the tumor  
#Total\_in\_Tumor: number of total sequencing reads covering that nucleotide position  
#Mutant\_in\_Normal: number of sequencing reads containing the mutation in the matched germline sample  
#Total\_in\_Normal: total number of reads at the site in the matched germline sample  
MAF: mutant allele frequency ( $\#Mutant\_in\_Tumor/\#Total\_in\_Tumor$ )  
Reference Allele: allele in the reference genome, insertions are denoted with “-“  
Mutant Allele: non-reference allele  
Flanking: nucleotide sequence surrounding the mutation site [reference/mutant]  
Validation Status: status of the mutation (somatic, uncovered, wild type, or germline)  
SIFTResult: prediction of the mutations effect on the protein  
SIFTScore: numerical score from the SIFT algorithm  
pph2result: PolyPhen-2 prediction of the mutations effect  
pph2score: score from the PolyPhen-2 algorithm

Supplementary Table 6: Validated WES mutations

Columns in the same order as Supplementary Table 5.

Supplementary Table 7: Recurrent somatic mutations in discovery and recurrency cohorts

Columns in the same order as Supplementary Table 5.

Supplementary Table 8: Copy number alterations identified by WGS

Sample: Sample identifier

HG\_Version: reference genome build

Chromosome Location: Chromosome number and cytoband

Start: nucleotide position of the 5' end of the CNA  
End: nucleotide position of the 3' end of the CNA  
CNAs:  
Size (kb): size in kilobases of the alteration  
Number of Genes: number of genes contained within the CNA region  
Genes: genes contained within the region (only shown if the number <10)  
# of miRNAs: number of micro RNA genes found within the region  
# of CGC Genes: number of genes within the region that are on the cancer gene consensus list  
CGC Genes: cancer gene consensus list genes

Supplementary Table 9: Validated structural variants for the 17 pediatric CBF-AML discovery cases

Sample: Sample identifiers  
ChrA: chromosome for breakpoint A  
PosA: position of breakpoint A  
OrientationA: "+" region left of the breakpoint is included in the mutation or "-" region right of the breakpoint is included in the mutation  
SclipA:  
ChrB, PosB, OrientationB, SclipB: same as with A, but the other end of the breakpoint  
Type: INS – insertion, CTX – interchromosomal translocation, DEL – deletion, INV – inversion, ITX – intrachromosomal translocation  
Usage: Intronic/intergenic – neither endpoint was in a gene, genic – both endpoints were in genes, truncating – one endpoint led to a truncation of a gene, half\_intergenic – one endpoint was in a gene, but no truncation results

Supplementary Table 10: Rank ordered list of genes differentially expressed in DHX15 knockdown cells and their enrichment in the Reactome mRNA splicing gene set

Supplementary Table 11: Rank ordered list of genes differentially expressed in DHX15 knockdown cells and their enrichment in the KEGG ribosome gene set

Supplementary Table 12: GSEA enriched gene sets after *DHX15* knockdown

Supplementary Table 13: IP mass spectrometry spectral counts

SC: Spectral counts  
TP: Total peptides

Supplementary Table 14: RNAseq *RUNX1-RUNX1T1* upregulated genes

Gene: HUGO gene name  
FoldChange: Expression change between RUNX1-RUNX1T1 and CBFβ-MYH11  
Mean\_inv16: Mean expression in CBFβ-MYH11 cases  
Mean\_AE: Mean expression in RUNX1-RUNX1T1 cases  
FDR: False discovery rate

Supplementary Table 15: RNAseq *RUNX1-RUNX1T1* downregulated genes

Columns in the same order as Supplementary Table 11

Supplementary Table 16: GSEA gene list

Supplementary Table 17: Copy Number Analysis of de novo-relapse pairs

Chrom: Chromosome  
loc.start: Start of copy number alteration  
loc.end: End of copy number alteration  
num.mark: number of variable-length windows contained in the segment called  
seg.mean:  $\log_2$ [Tumor coverage/germline coverage]  
observed.CN: Copy number converted from  $\log_2$  ratio values listed in "seg.mean"  
comments: Comments regarding type of alteration  
Cytoband: Chromosomal location based on cytogenetic banding  
num\_gene: number of genes involved  
genes: specific genes involved

Supplementary Table 18: Deep sequencing read counts in diagnosis, germline, and relapse trios

GeneName: HUGO gene name  
Sample: Patient sample identifier  
Chr: Chromosome  
WU\_HG19: nucleotide position in hg19  
Class: mutation class  
AAChange: amino acid change resulting from the mutation  
#Mutant\_in\_D: number of sequencing reads containing the mutation in the diagnosis sample  
#Total\_in\_D: number of total sequencing reads covering that nucleotide position in the diagnosis sample  
#Mutant\_in\_normal: number of sequencing reads containing the mutation in the matched germline sample  
#Total\_in\_normal: total number of reads at the site in the matched germline sample  
#Mut\_in\_R: number of sequencing reads containing the mutation in the relapse sample  
#Total\_in\_R: number of total sequencing reads covering that nucleotide position in the relapse sample  
MAF\_D: Mutant allele frequency in the diagnosis sample  
MAF\_G: Mutant allele frequency in the germline sample  
MAF\_R: Mutant allele frequency in the relapse sample  
Forward Primer: Sequence of forward primer  
Reverse Primer: Sequence of reverse primer  
Forward Primer Tm: Melting temperature of forward primer  
Reverse Primer Tm: Melting temperature of reverse primer  
Flanking Sequence (SNV pos = []): Sequence flanking the SNV, which is marked by brackets  
Percent GC target: Percentage of GC base pairs in the target sequence  
Predicted Amplicon Size: Size of predicted amplicon using indicated primers

Supplementary Table 19: Oligonucleotides used in this study

Identifier: Catalog number for Stealth or Silencer siRNAs, internal identifier for site-directed mutagenesis primers  
Sequence: Sequence of indicated oligonucleotide

## Supplementary Note

### Signaling mutations in CBF AML

In our analysis, 109 out of 165 cases harbored mutations in signaling genes *NF1*, *PTPN11*, *KRAS*, *FLT3*, *KIT*, and *NRAS*. Mutations in these genes were enriched in *CBFB-MYH11* AMLs, as 56.4% of *RUNX1-RUNX1T1* cases had mutations in these genes, compared to 76.2% of *CBFB-MYH11* cases (Figure 1;  $p=0.0086$ ). Alterations in these 6 genes were not cumulatively associated with outcome (see Supplementary Tables). Although mutations in these 6 genes were less common in *RUNX1-RUNX1T1*, cases of that subtype did have mutations in *CCND2*, *MGA* and *MYC* more frequently than *CBFB-MYH11* cases (16.4% vs 3.75%), which also were not associated with outcome (data not shown).

We detected *NRAS* and *KIT* mutations in 56 and 33 *de novo* cases, respectively. There was a significant difference in the distribution of *NRAS* Q61 and G12/G13 mutations between the two CBF-AML subgroups, with more codon 61 alterations in *CBFB-MYH11* cases ( $p=0.0023$ ). Mutation status of *NRAS* did not correlate with outcomes (Supplementary Figure 8). All these mutations lead to enhanced Ras pathway signaling, ultimately resulting in increased MAP kinase activation<sup>80</sup> and thus cells harboring these mutations are predicted to be sensitive to MEK inhibitors<sup>81</sup>.

*KIT* mutations are relatively common in CBF-AML with reported frequencies between 17% and 48%<sup>82,83</sup>. Similar to *NRAS*, the spectrum of *KIT* mutations differed between the two subgroups, with exon 8 mutations being more common in *CBFB-MYH11* patients and exon 17 mutations having an increased prevalence in *RUNX1-RUNX1T1* patients ( $p=0.0051$ ). Mutations in exon 17, but not exon 8, were associated with inferior outcome. One case (SBCBF030) lost a subclone with an exon 8 mutation and retained an exon 17 mutation at relapse. These data are relevant as the kinase inhibitor imatinib has shown efficacy as a *KIT* antagonist, although it is ineffective against the constitutively active D816 mutation<sup>83</sup>. However, the N822K mutation is not resistant to imatinib and is as sensitive as wild type *KIT* to inhibition by imatinib<sup>83</sup>. Both mutations show varying sensitivity to dasatinib<sup>84</sup>.

### References

80. Dhillon, A.S., Hagan, S., Rath, O. & Kolch, W. MAP kinase signalling pathways in cancer. *Oncogene* **26**, 3279-90 (2007).
81. Burgess, M.R. *et al.* Preclinical efficacy of MEK inhibition in Nras-mutant AML. *Blood* **124**, 3947-55 (2014).
82. Boissel, N. *et al.* Incidence and prognostic impact of c-Kit, FLT3, and Ras gene mutations in core binding factor acute myeloid leukemia (CBF-AML). *Leukemia* **20**, 965-70 (2006).
83. Wang, Y.Y. *et al.* AML1-ETO and C-KIT mutation/overexpression in t(8;21) leukemia: implication in stepwise leukemogenesis and response to Gleevec. *Proc Natl Acad Sci U S A* **102**, 1104-9 (2005).
84. Wang, Y.Y. *et al.* C-KIT mutation cooperates with full-length AML1-ETO to induce acute myeloid leukemia in mice. *Proc Natl Acad Sci U S A* **108**, 2450-5 (2011).
